# Supplementary material for: Three-in-One Fluorescent Sensing and Imaging of Chemical Warfare Agents: Sulfur Mustard, Sarin, and Cyanide
Source: Research Square preprint supplement (doi:10.21203/rs.3.rs-7850015/v1), 2025-10-23
Supplement: Supplementary file 1 [file 68b24067457c5a0094d64a21.docx]

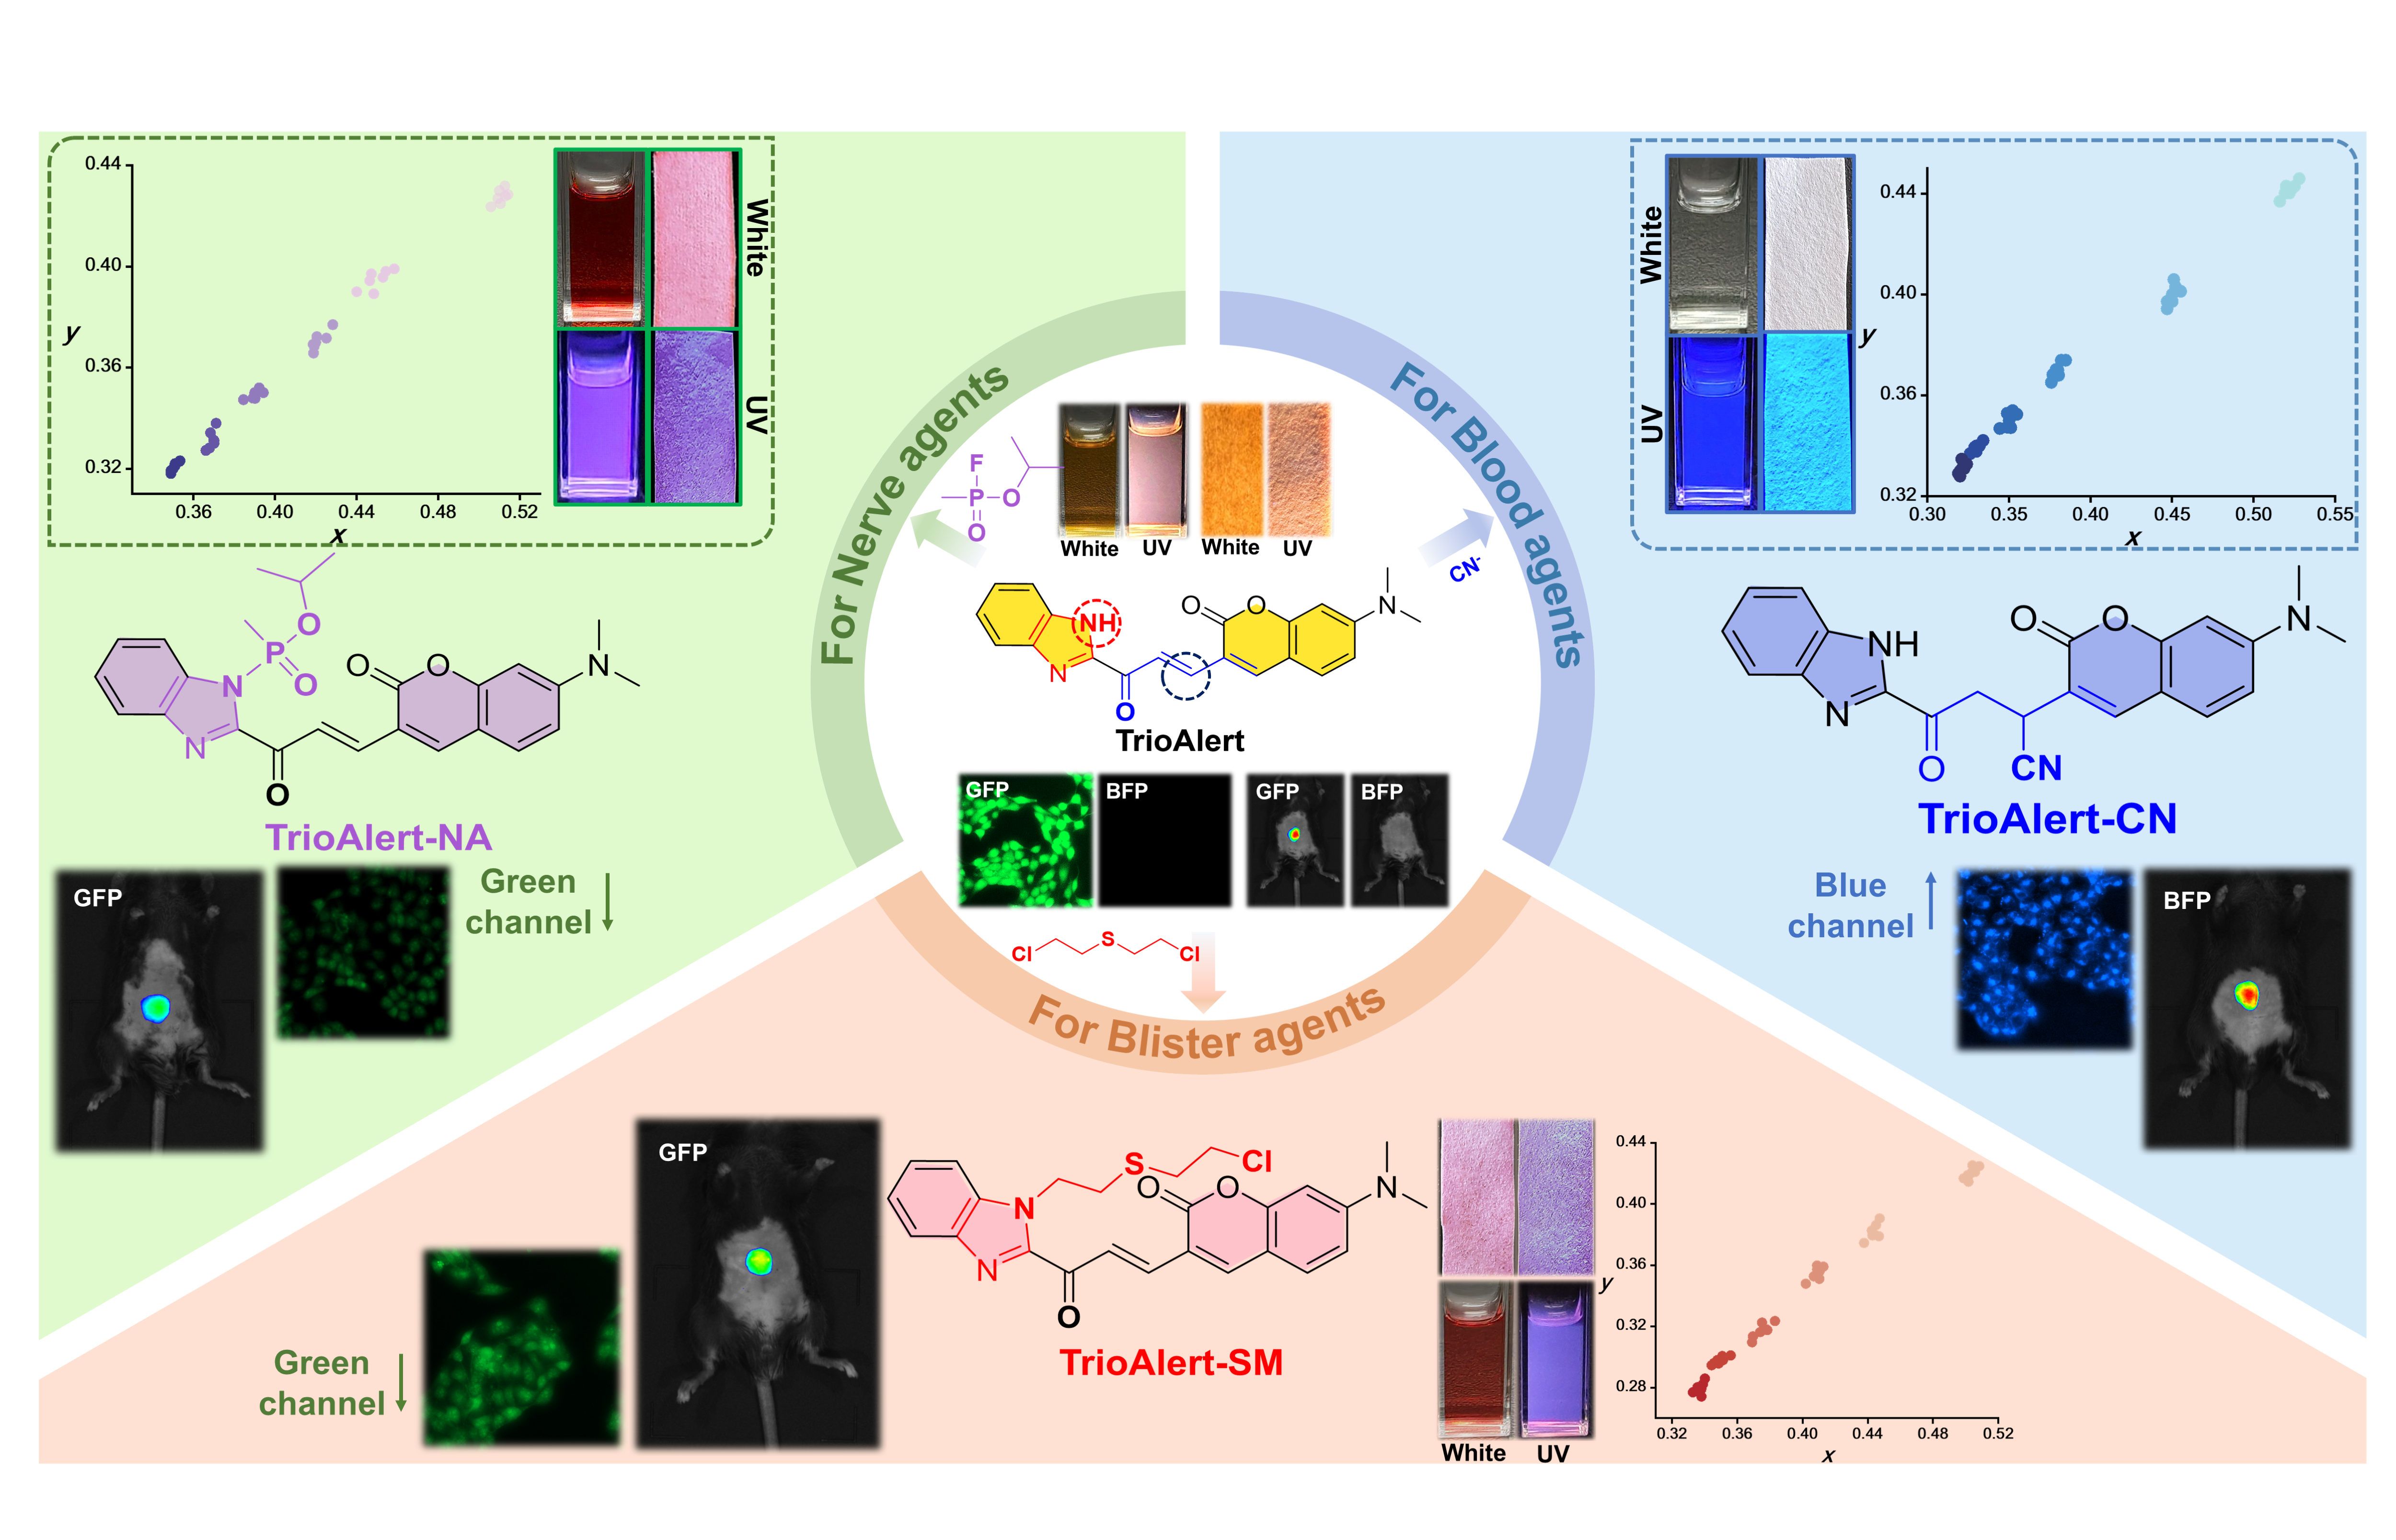


A novel fluorescent sensor, **TrioAlert**, is developed for simultaneous detection of sulfur mustard, sarin, and cyanide. The sensor demonstrates a rapid response (<90 s), high sensitivity, and distinct fluorescence/color changes. **TrioAlert**-loaded test strips enable smartphone-based on-site analysis. Successful visualization in live cells and mouse models confirms its value for field deployment and biomedical diagnostics.
