# Supplementary material for: Three-in-One Fluorescent Sensing and Imaging of Chemical Warfare Agents: Sulfur Mustard, Sarin, and Cyanide
Source: Research Square preprint supplement (doi:10.21203/rs.3.rs-7850015/v1), 2025-10-23
Supplement: Supplementary file 2 [file c3a1206d1607582220c99c47.docx]

*Electronic Supplementary information for*

**Three-in-One Fluorescent Sensing and Imaging of Chemical Warfare Agents: Sulfur Mustard, Sarin, and Cyanide**

Junhong Liu a†, Yin Gong a†, Linwen Tan e†, Jinfeng Cen a†, Mo Li c, Chuyu Wang a, Xuan Zhao e, Mingxue Sun a*, Qitao Tan b*, Wen-Qi Meng a,d,e*

a Faculty of Naval Medicine, Naval Military Medical University, Shanghai, 200433, China. E-mail: wenqimeng@smmu.edu.cn

b Department of Chemistry, College of Sciences, Shanghai University, Shanghai, 200444, China. E-mail: qttan@shu.edu.cn

c School of Public Health, Hebei Medical University, Shijiazhuang, 050017, China. E-mail: xuxd@hebmu.edu.cn

d Laboratory of New Drug Research and Clinical Pharmacy, School of Pharmacy, Xuzhou Medical University, Xuzhou, China.

e Department of Environmental Health, School of Public Health, China Medical University, Shenyang 110122, China.

†These authors contributed equally to this work

*Corresponding author.


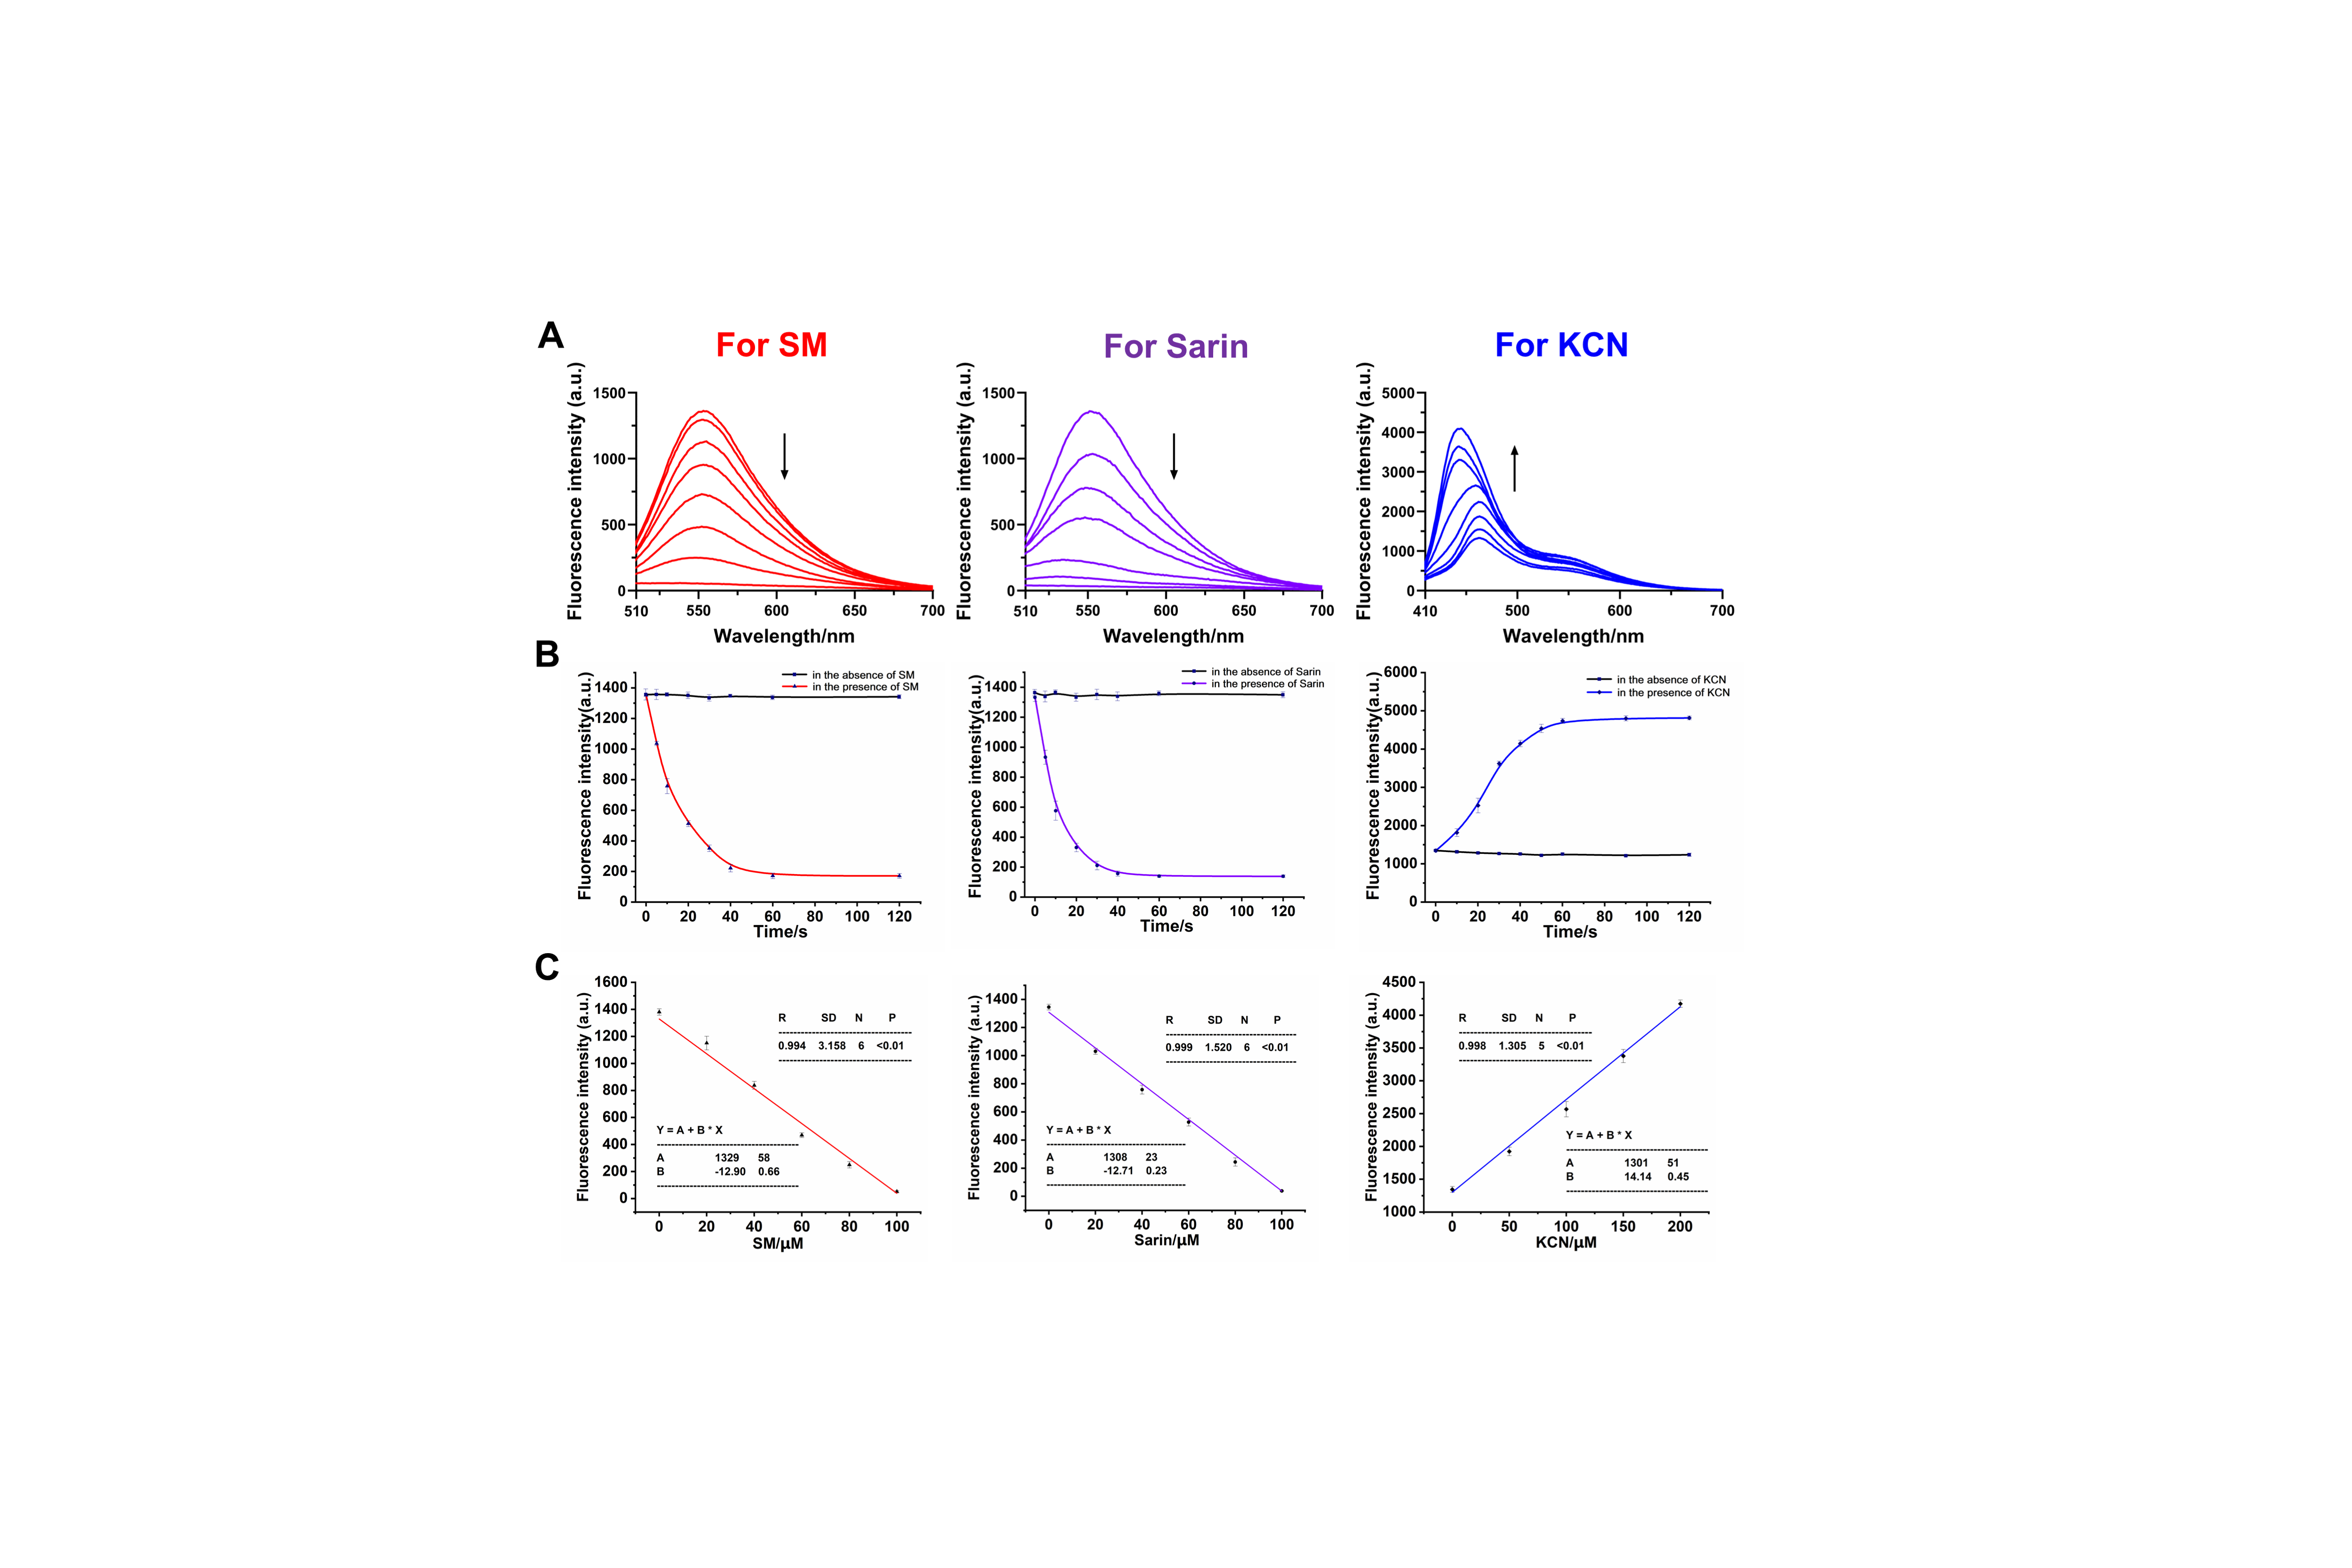


**Figure S1.** (A) Fluorescence emission spectra of **TrioAlert** (20 μM) in dichloromethane-PBS after gradual addition of SM (0-100 μM), sarin (0-100 μM), and KCN (0-200 μM) for 20 minutes (excitation wavelength: 480 nm for SM and sarin, 380 nm for KCN; slit width: 10 nm). (B) Time-dependent fluorescence intensity of **TrioAlert** (20 μM) in dichloromethane-PBS upon addition of SM (100 μM), sarin (100 μM), and KCN (200 μM) (excitation wavelength: 480 nm for SM and sarin, 380 nm for KCN; slit width: 10 nm). (C) Linear relationship between the fluorescence intensity of **TrioAlert** (20 μM) and the concentration of the reagents after gradual addition of SM (0-100 μM), sarin (0-100 μM), and KCN (0-200 μM) in dichloromethane-PBS (excitation wavelength: 480 nm for SM and sarin, 380 nm for KCN; slit width: 10 nm).

**
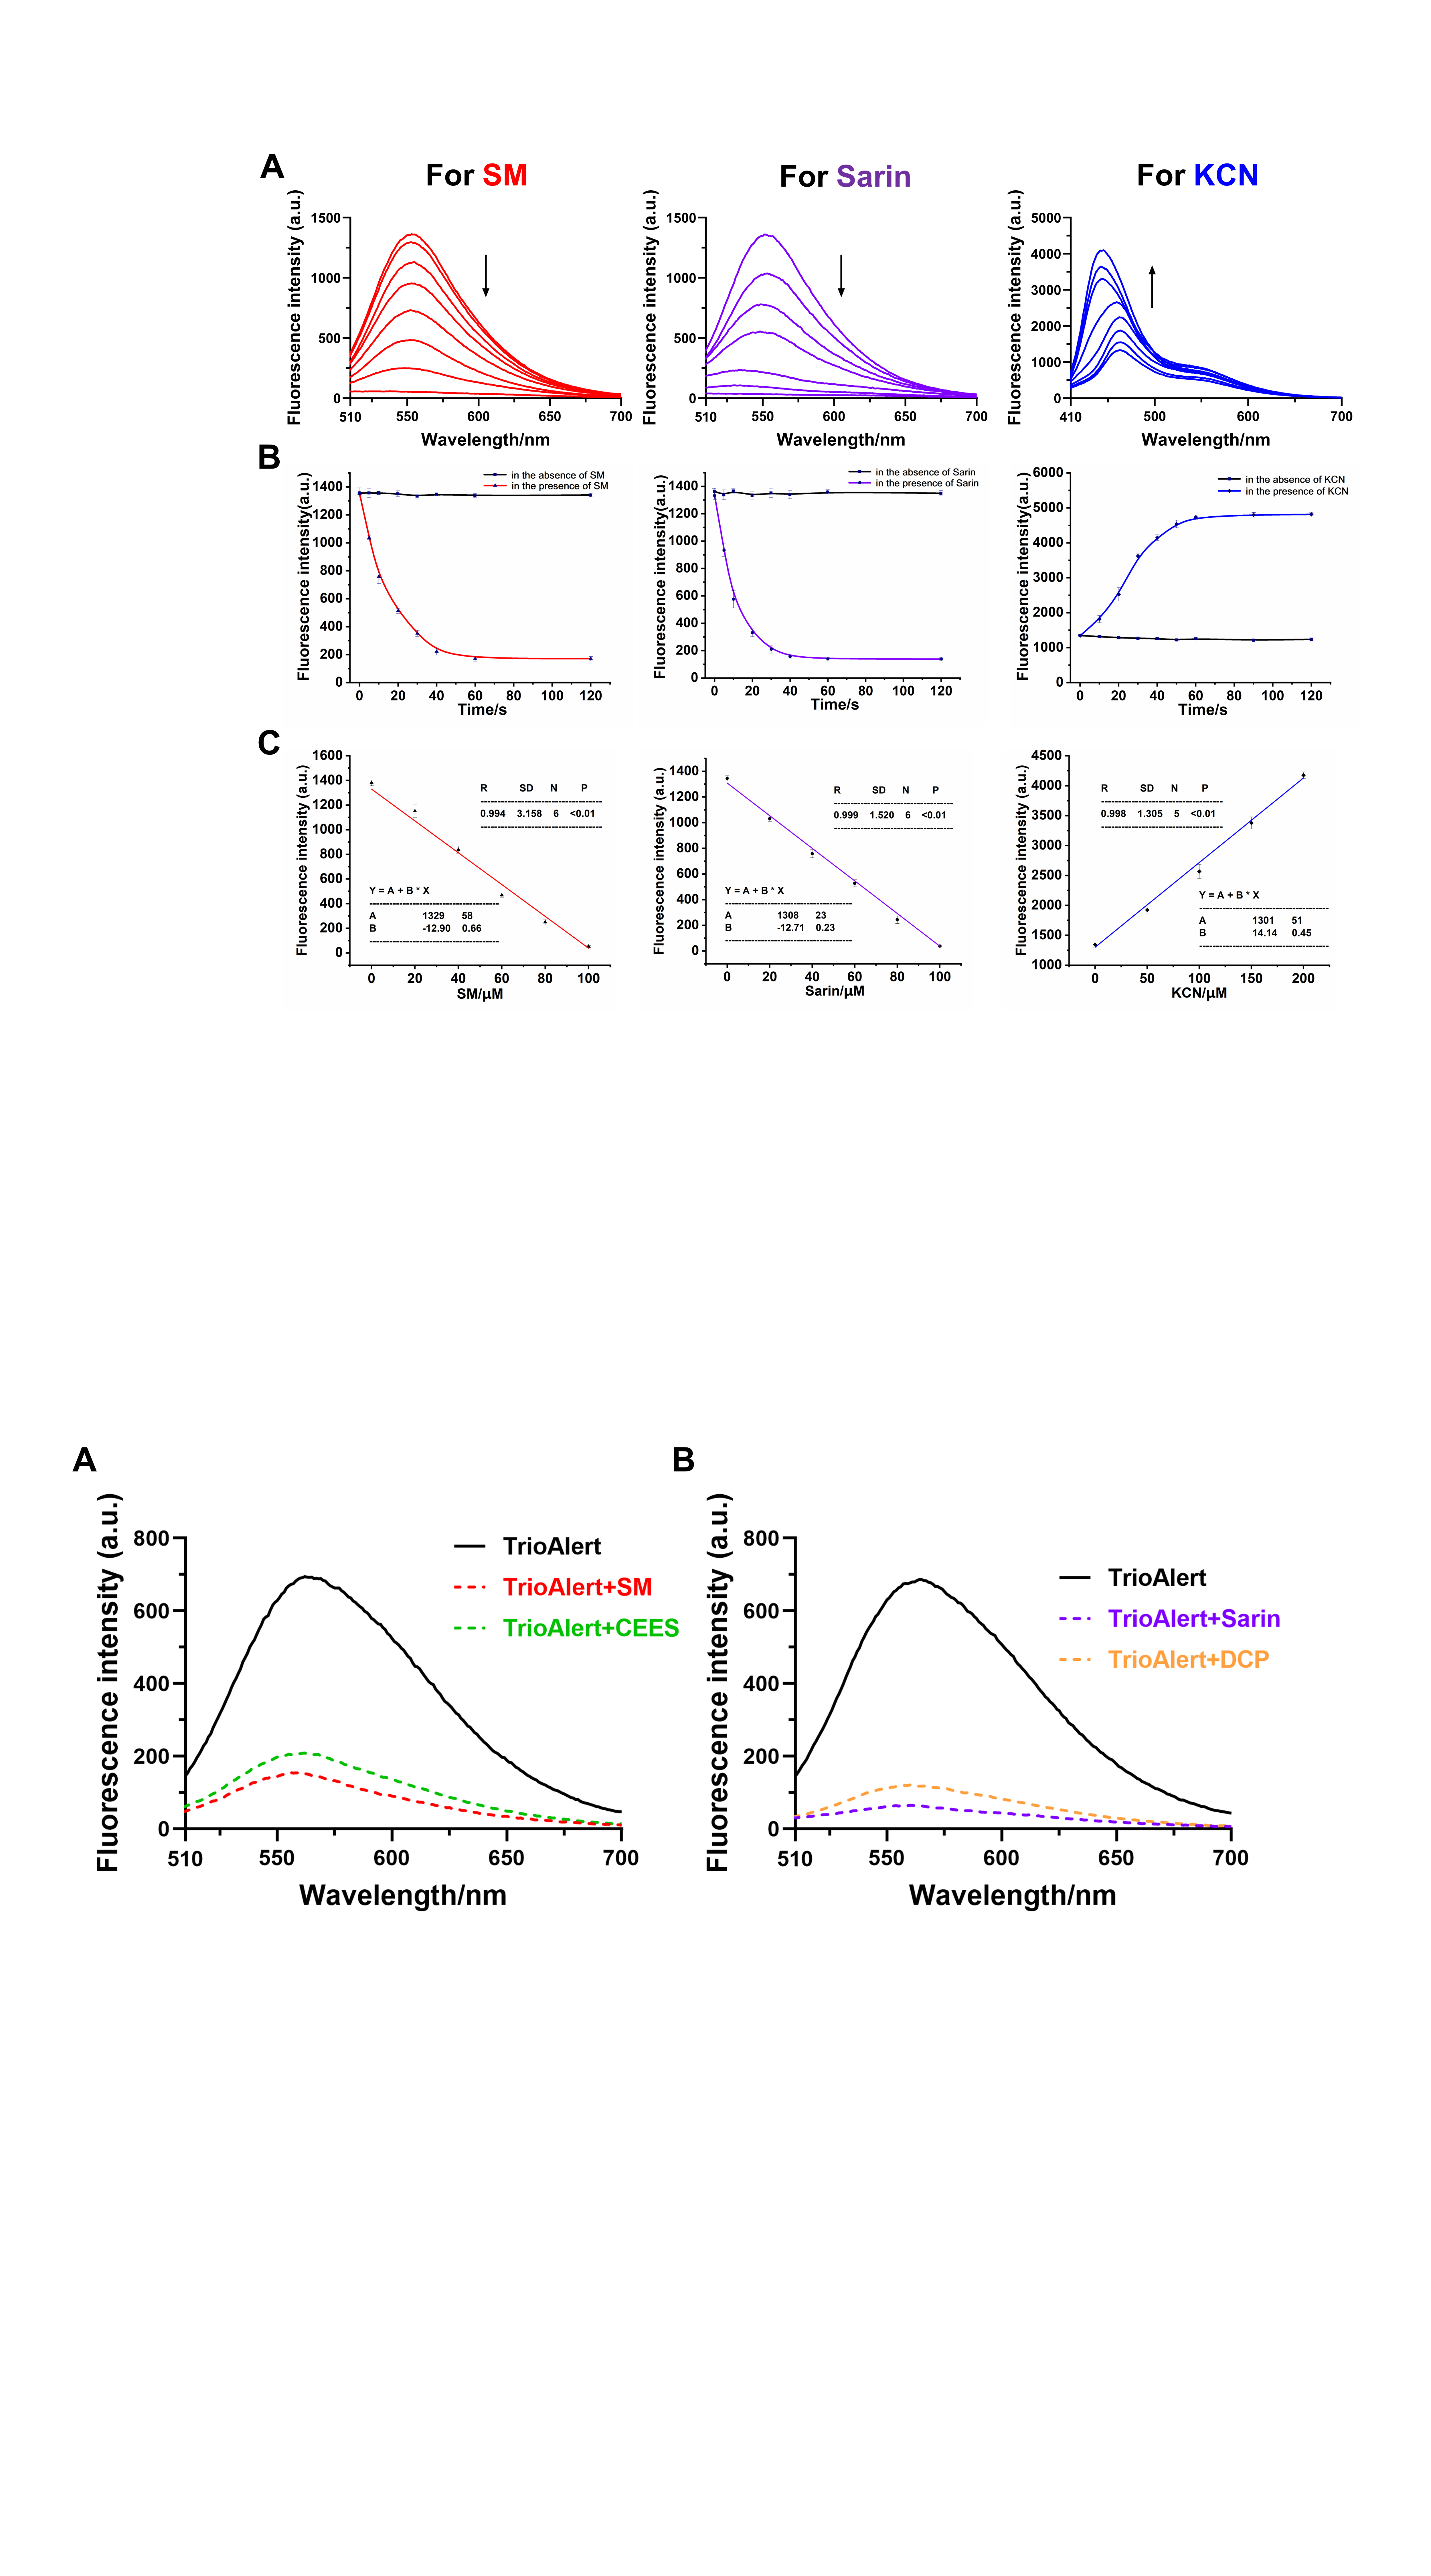
**

**Figure S2.** (A) Fluorescence emission spectra of **TrioAlert** (20 μM) in acetonitrile-PBS in the absence or presence of SM (100 μM) or 2-chloroethyl ethyl sulfide (CEES, 100 μM) after 20 min (excitation wavelength: 480 nm; slit width: 10 nm). (B) Fluorescence emission spectra of **TrioAlert** (20 μM) in acetonitrile-PBS in the absence or presence of sarin (100 μM) or DCP (100 μM) after 20 min (excitation wavelength: 480 nm; slit width: 10 nm).

**
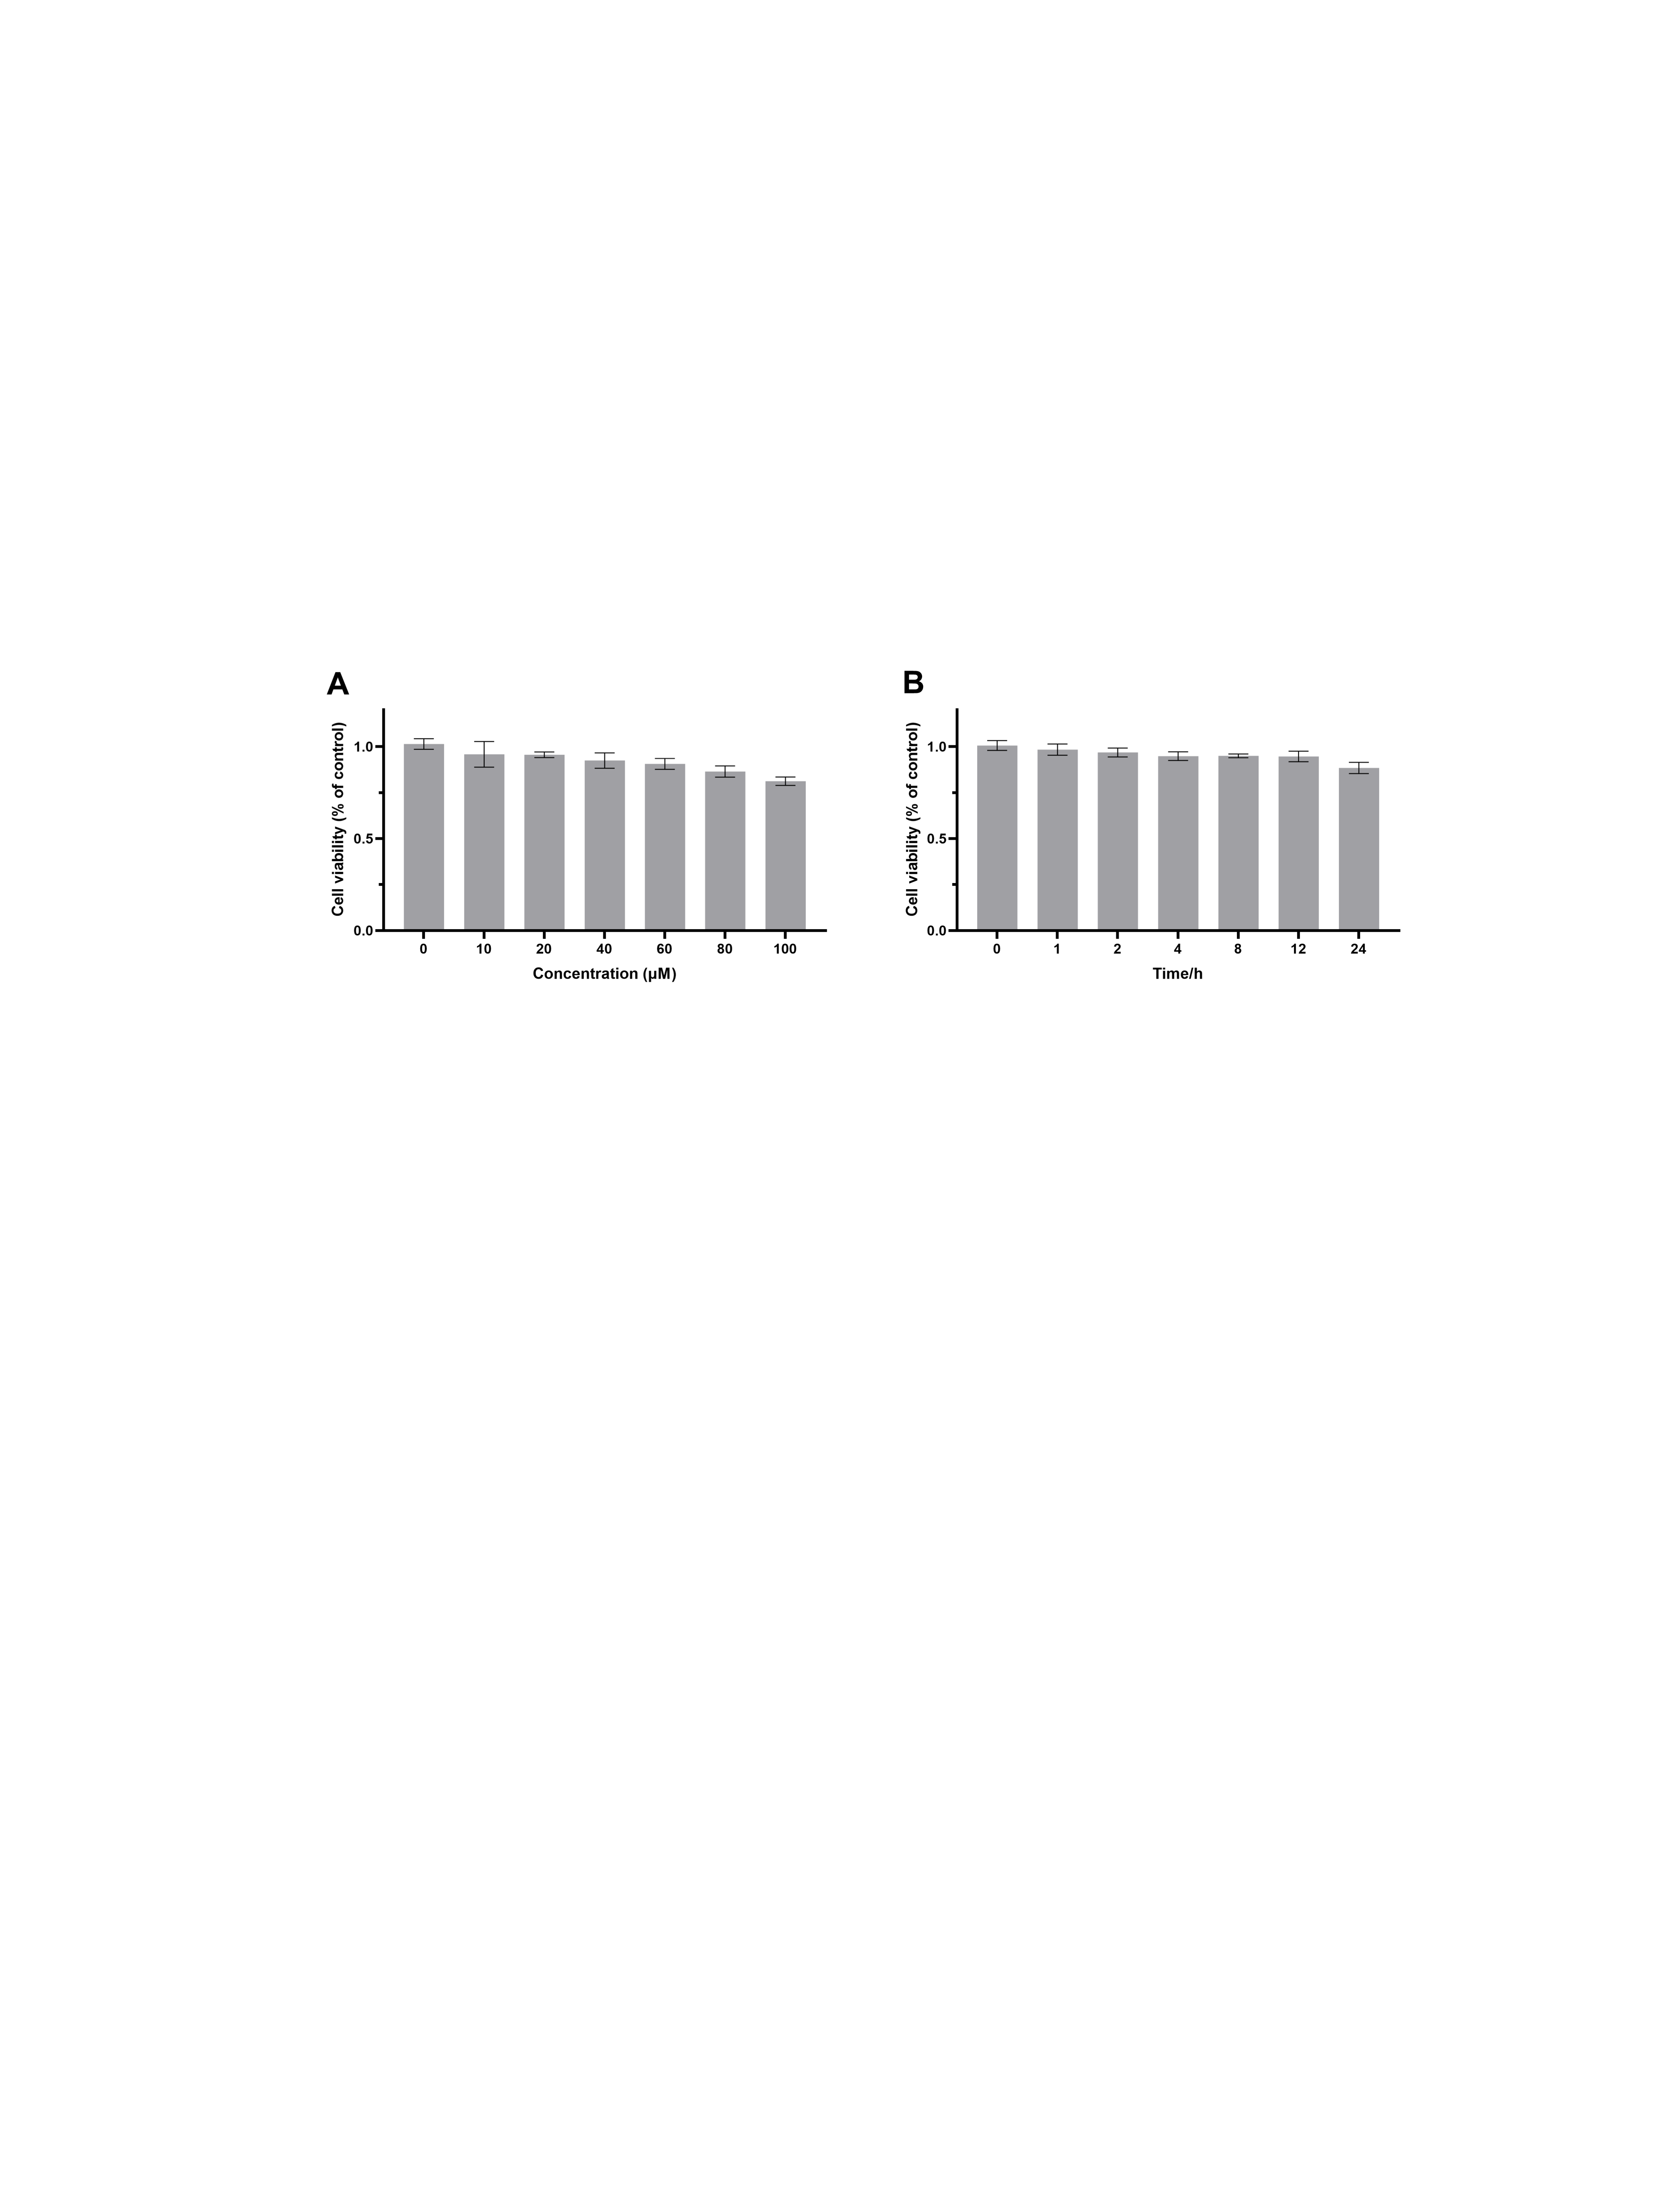
**

**Figure S3.** (A) HaCaT cells were treated with different concentrations **TrioAlert** (0, 10, 20, 40, 60, 80 and 100 μM) for 12 h. Cell viability was assessed using the CCK8 assay. (B) HaCaT cells were treated with 20 μM **TrioAlert** for various durations (0, 1, 2, 4, 8, 12, and 24 h). Cell viability was assessed using the CCK8 assay.


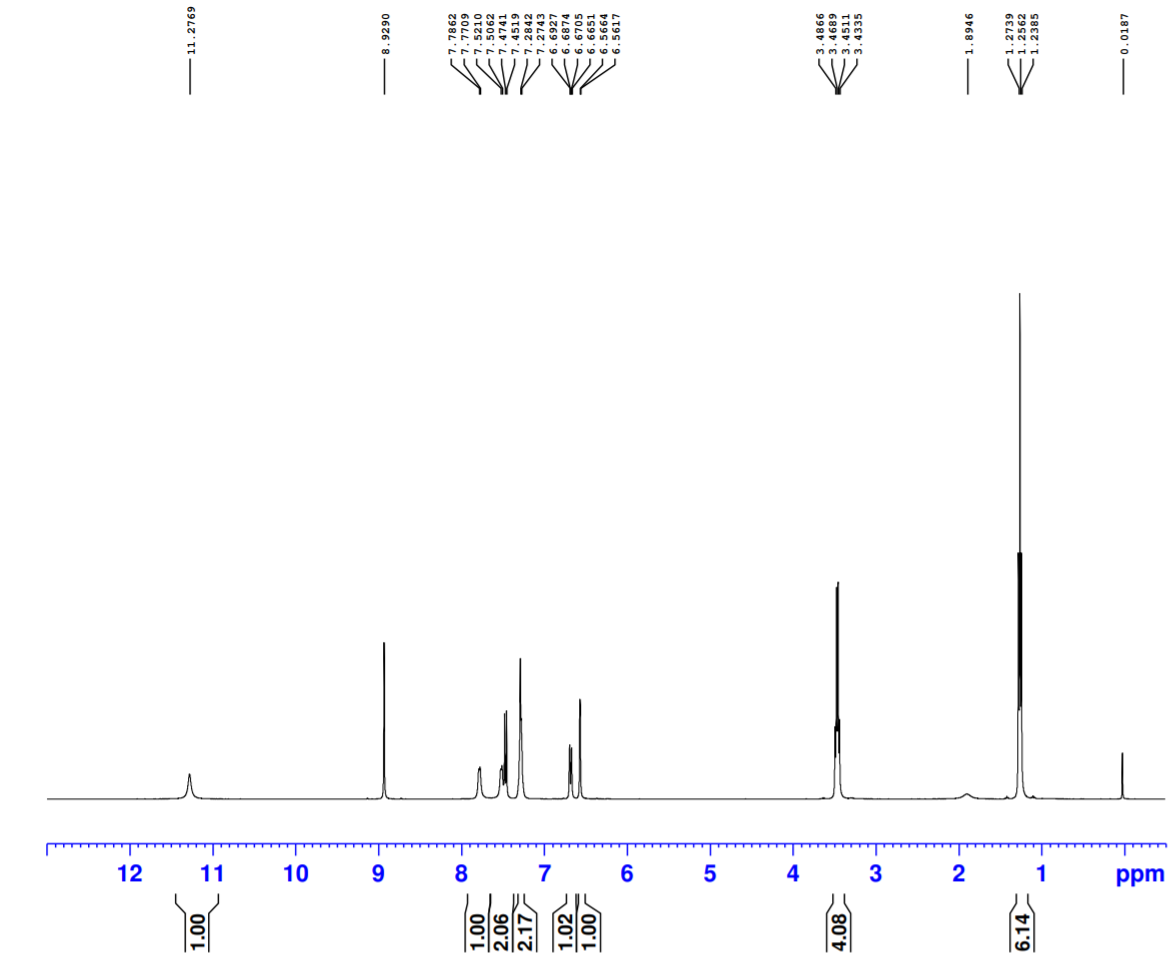


**Figure S4.** 1H NMR for **NNP-1** in Chloroform-*d*.


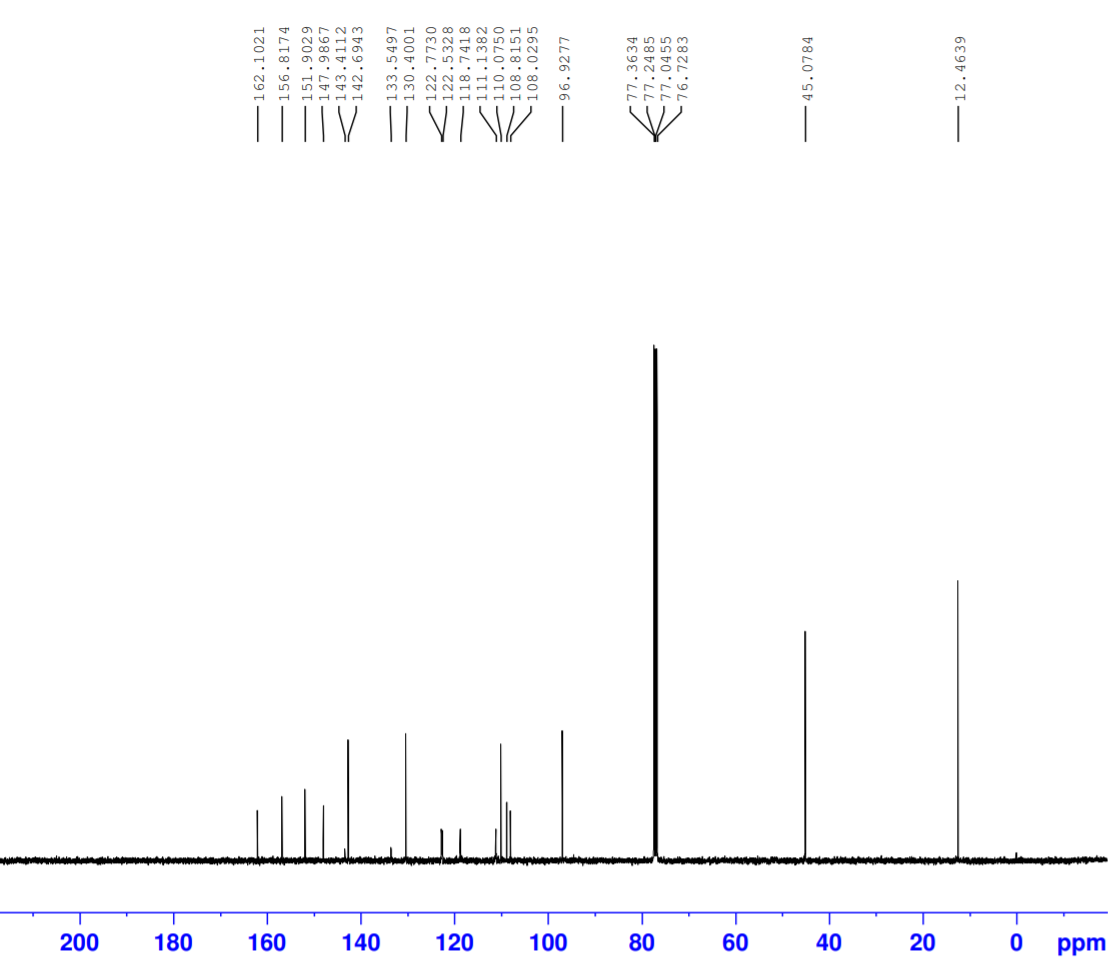


**Figure S5.** 13C NMR for **NNP-1** in Chloroform-*d*.


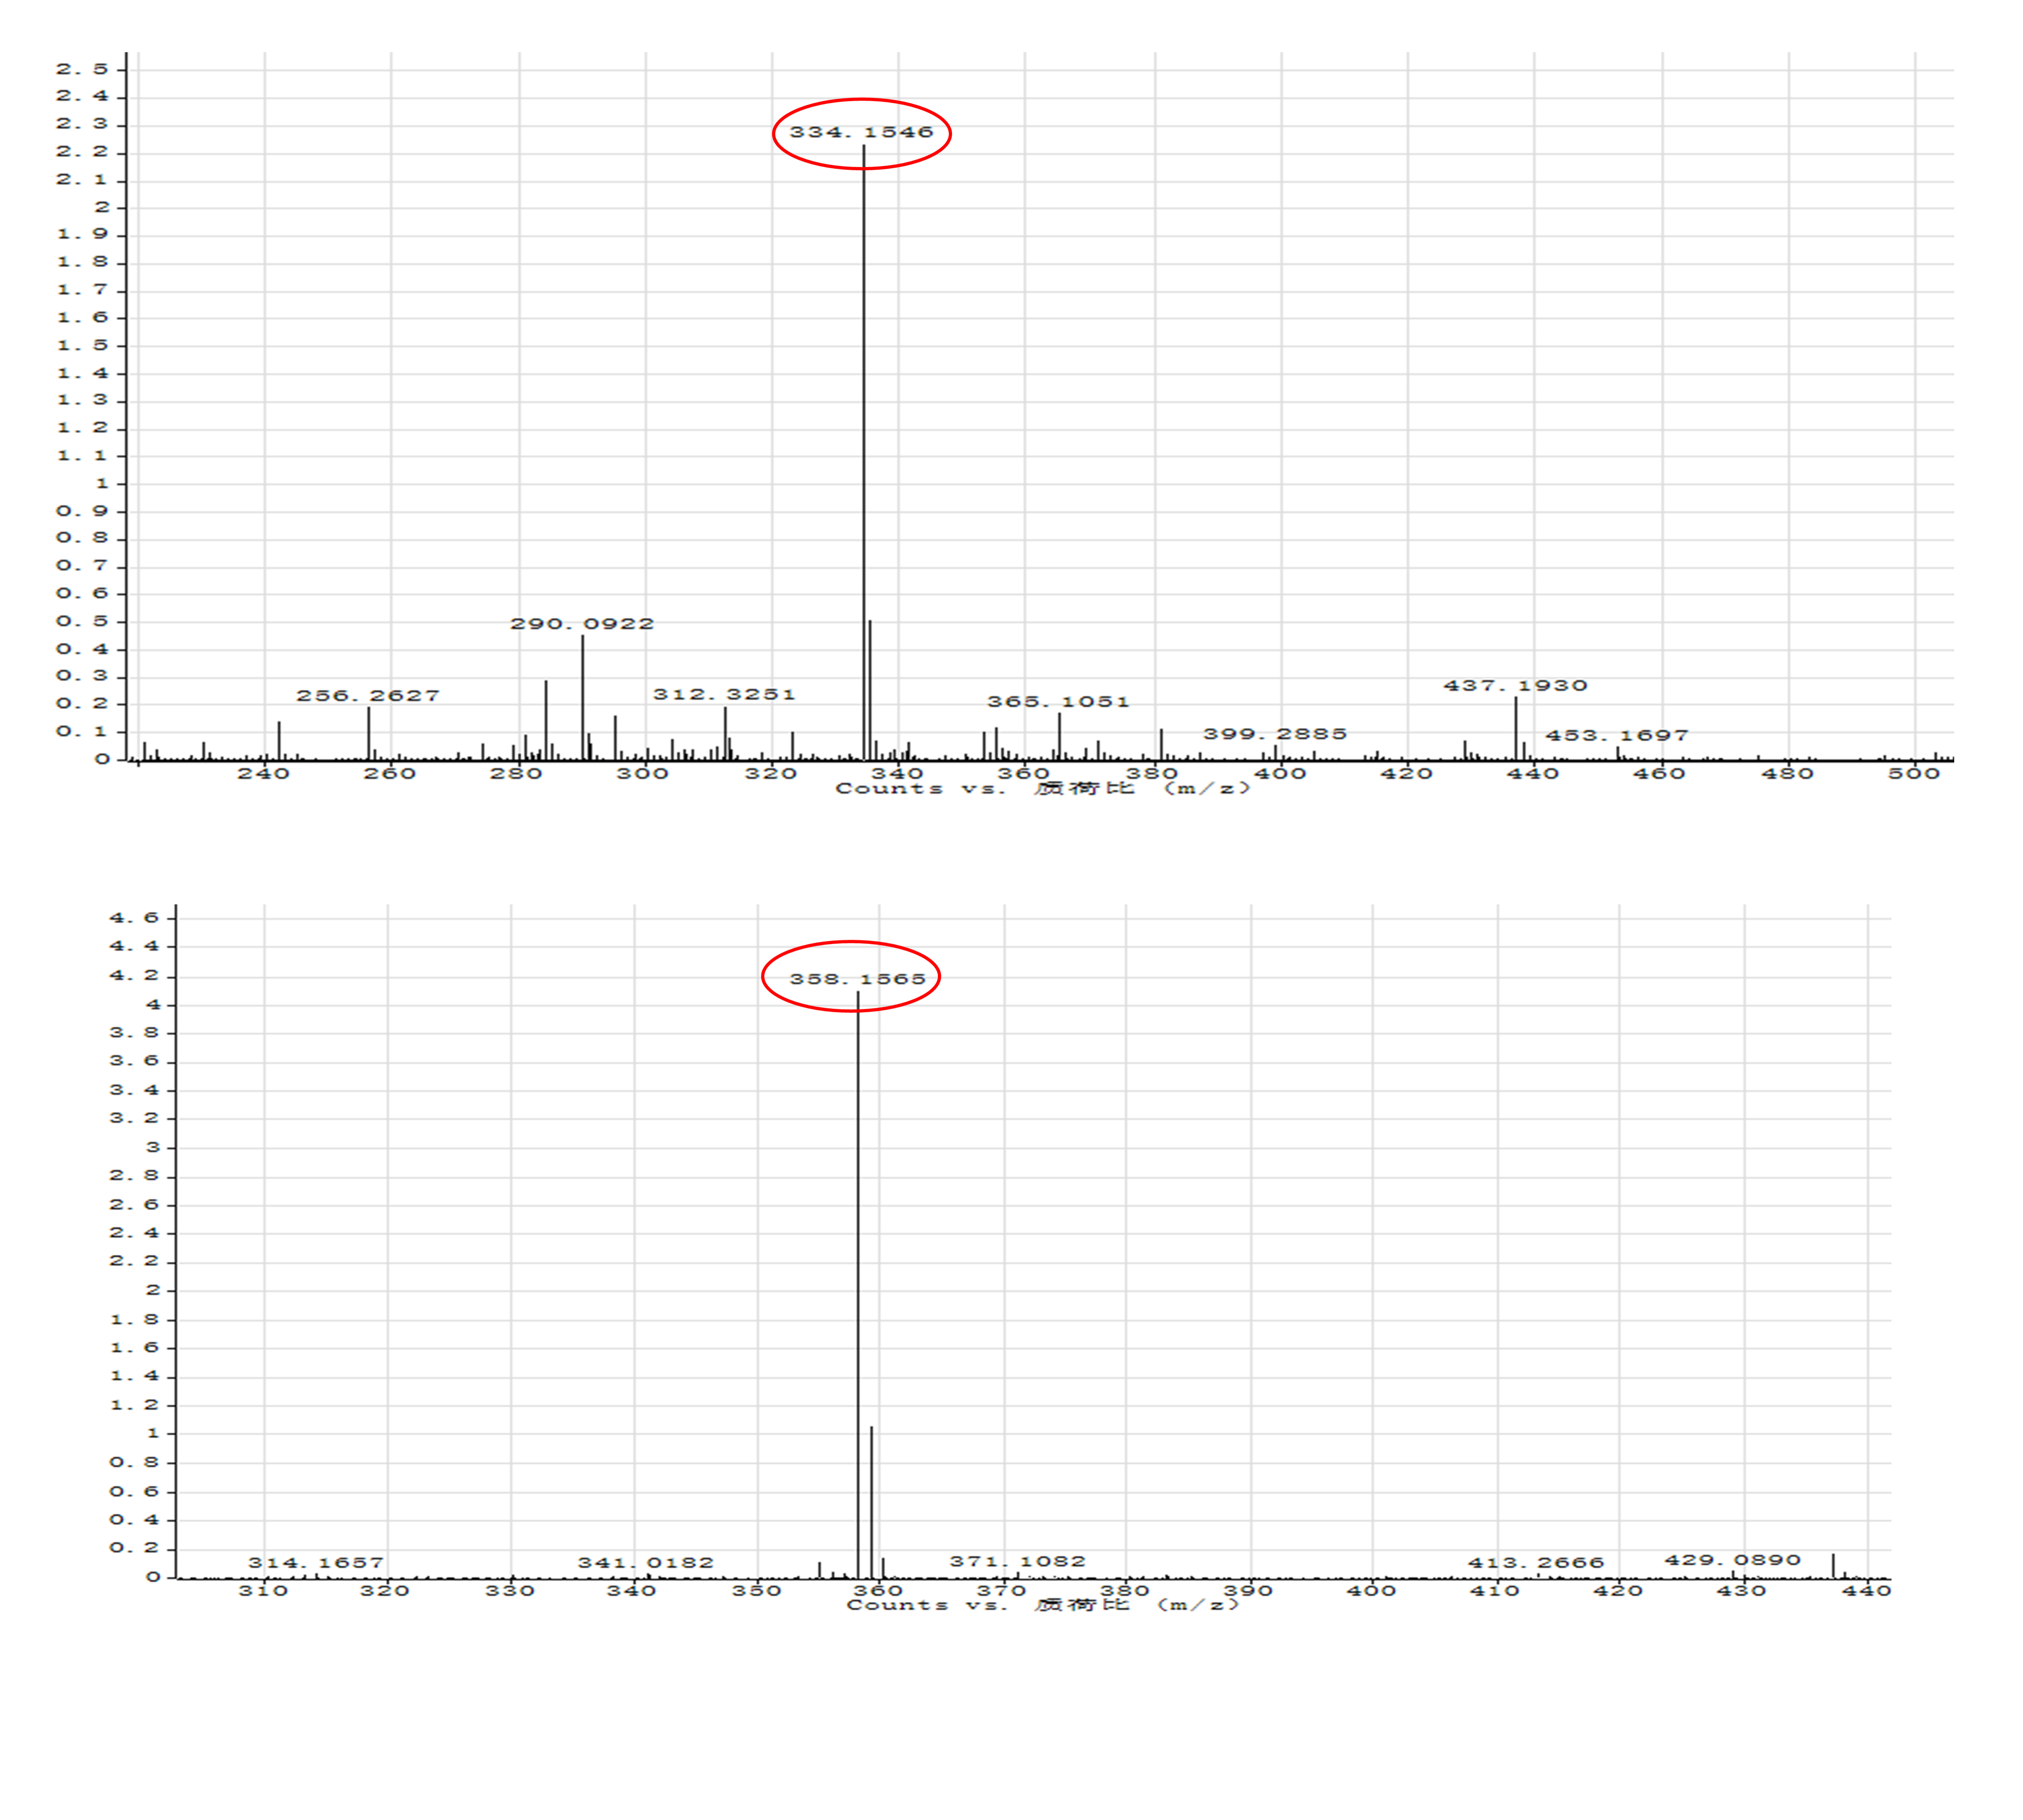


**Figure S6.** HRMS spectrum of compound **NNP-1**.


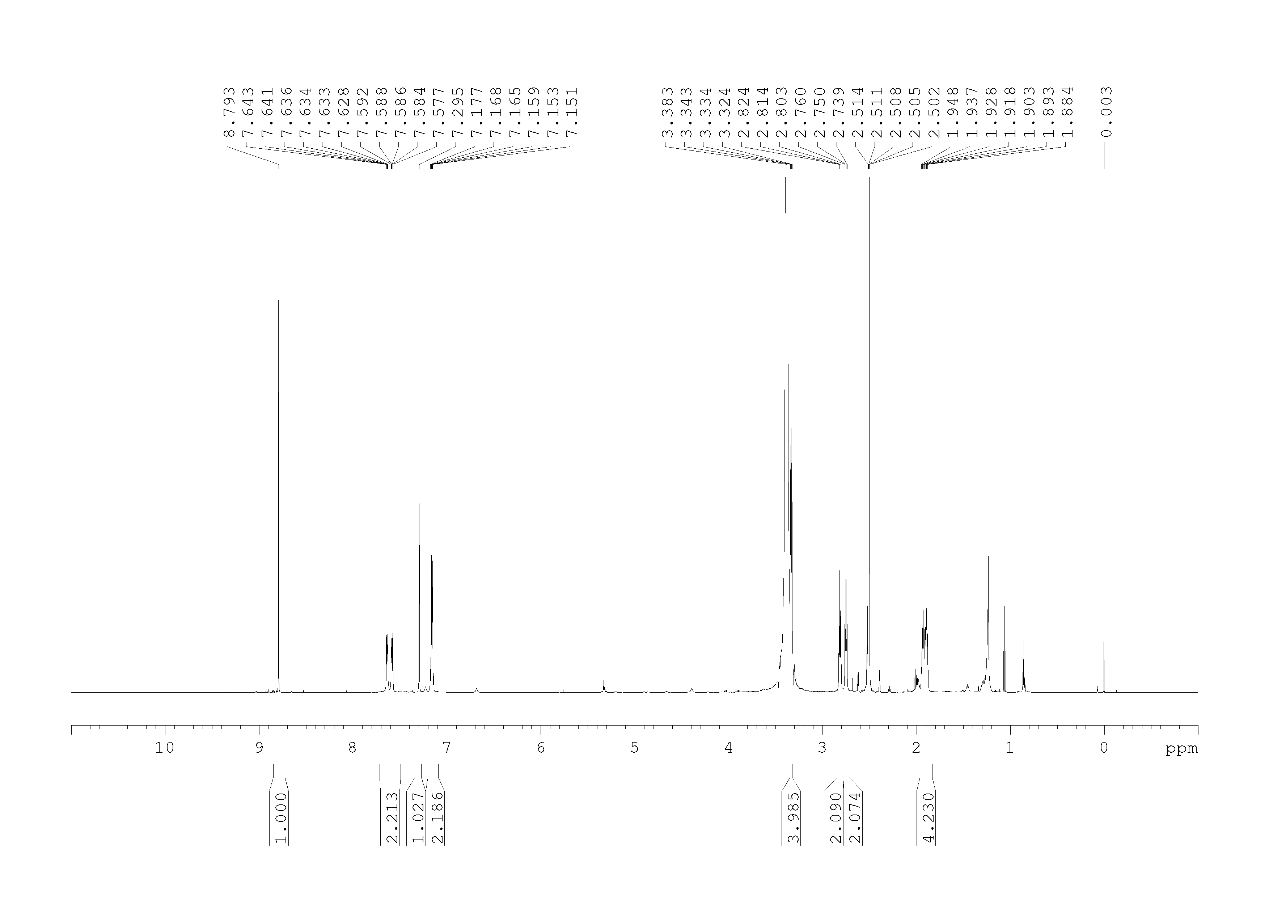


**Figure S7.** 1H NMR for **NNP-2** in DMSO-*d*6.


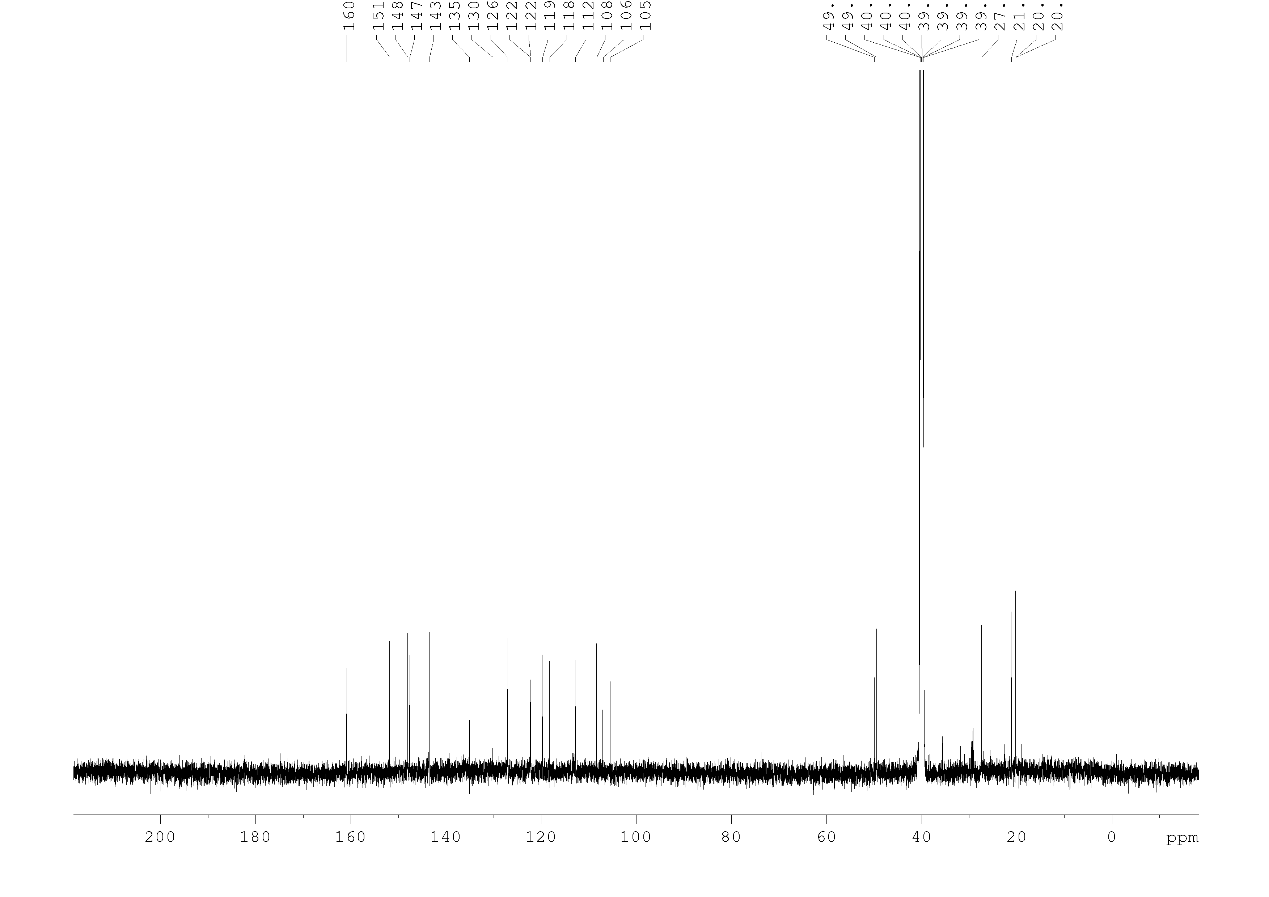


**Figure S8.** 13C NMR for **NNP-2** in DMSO-*d*6.


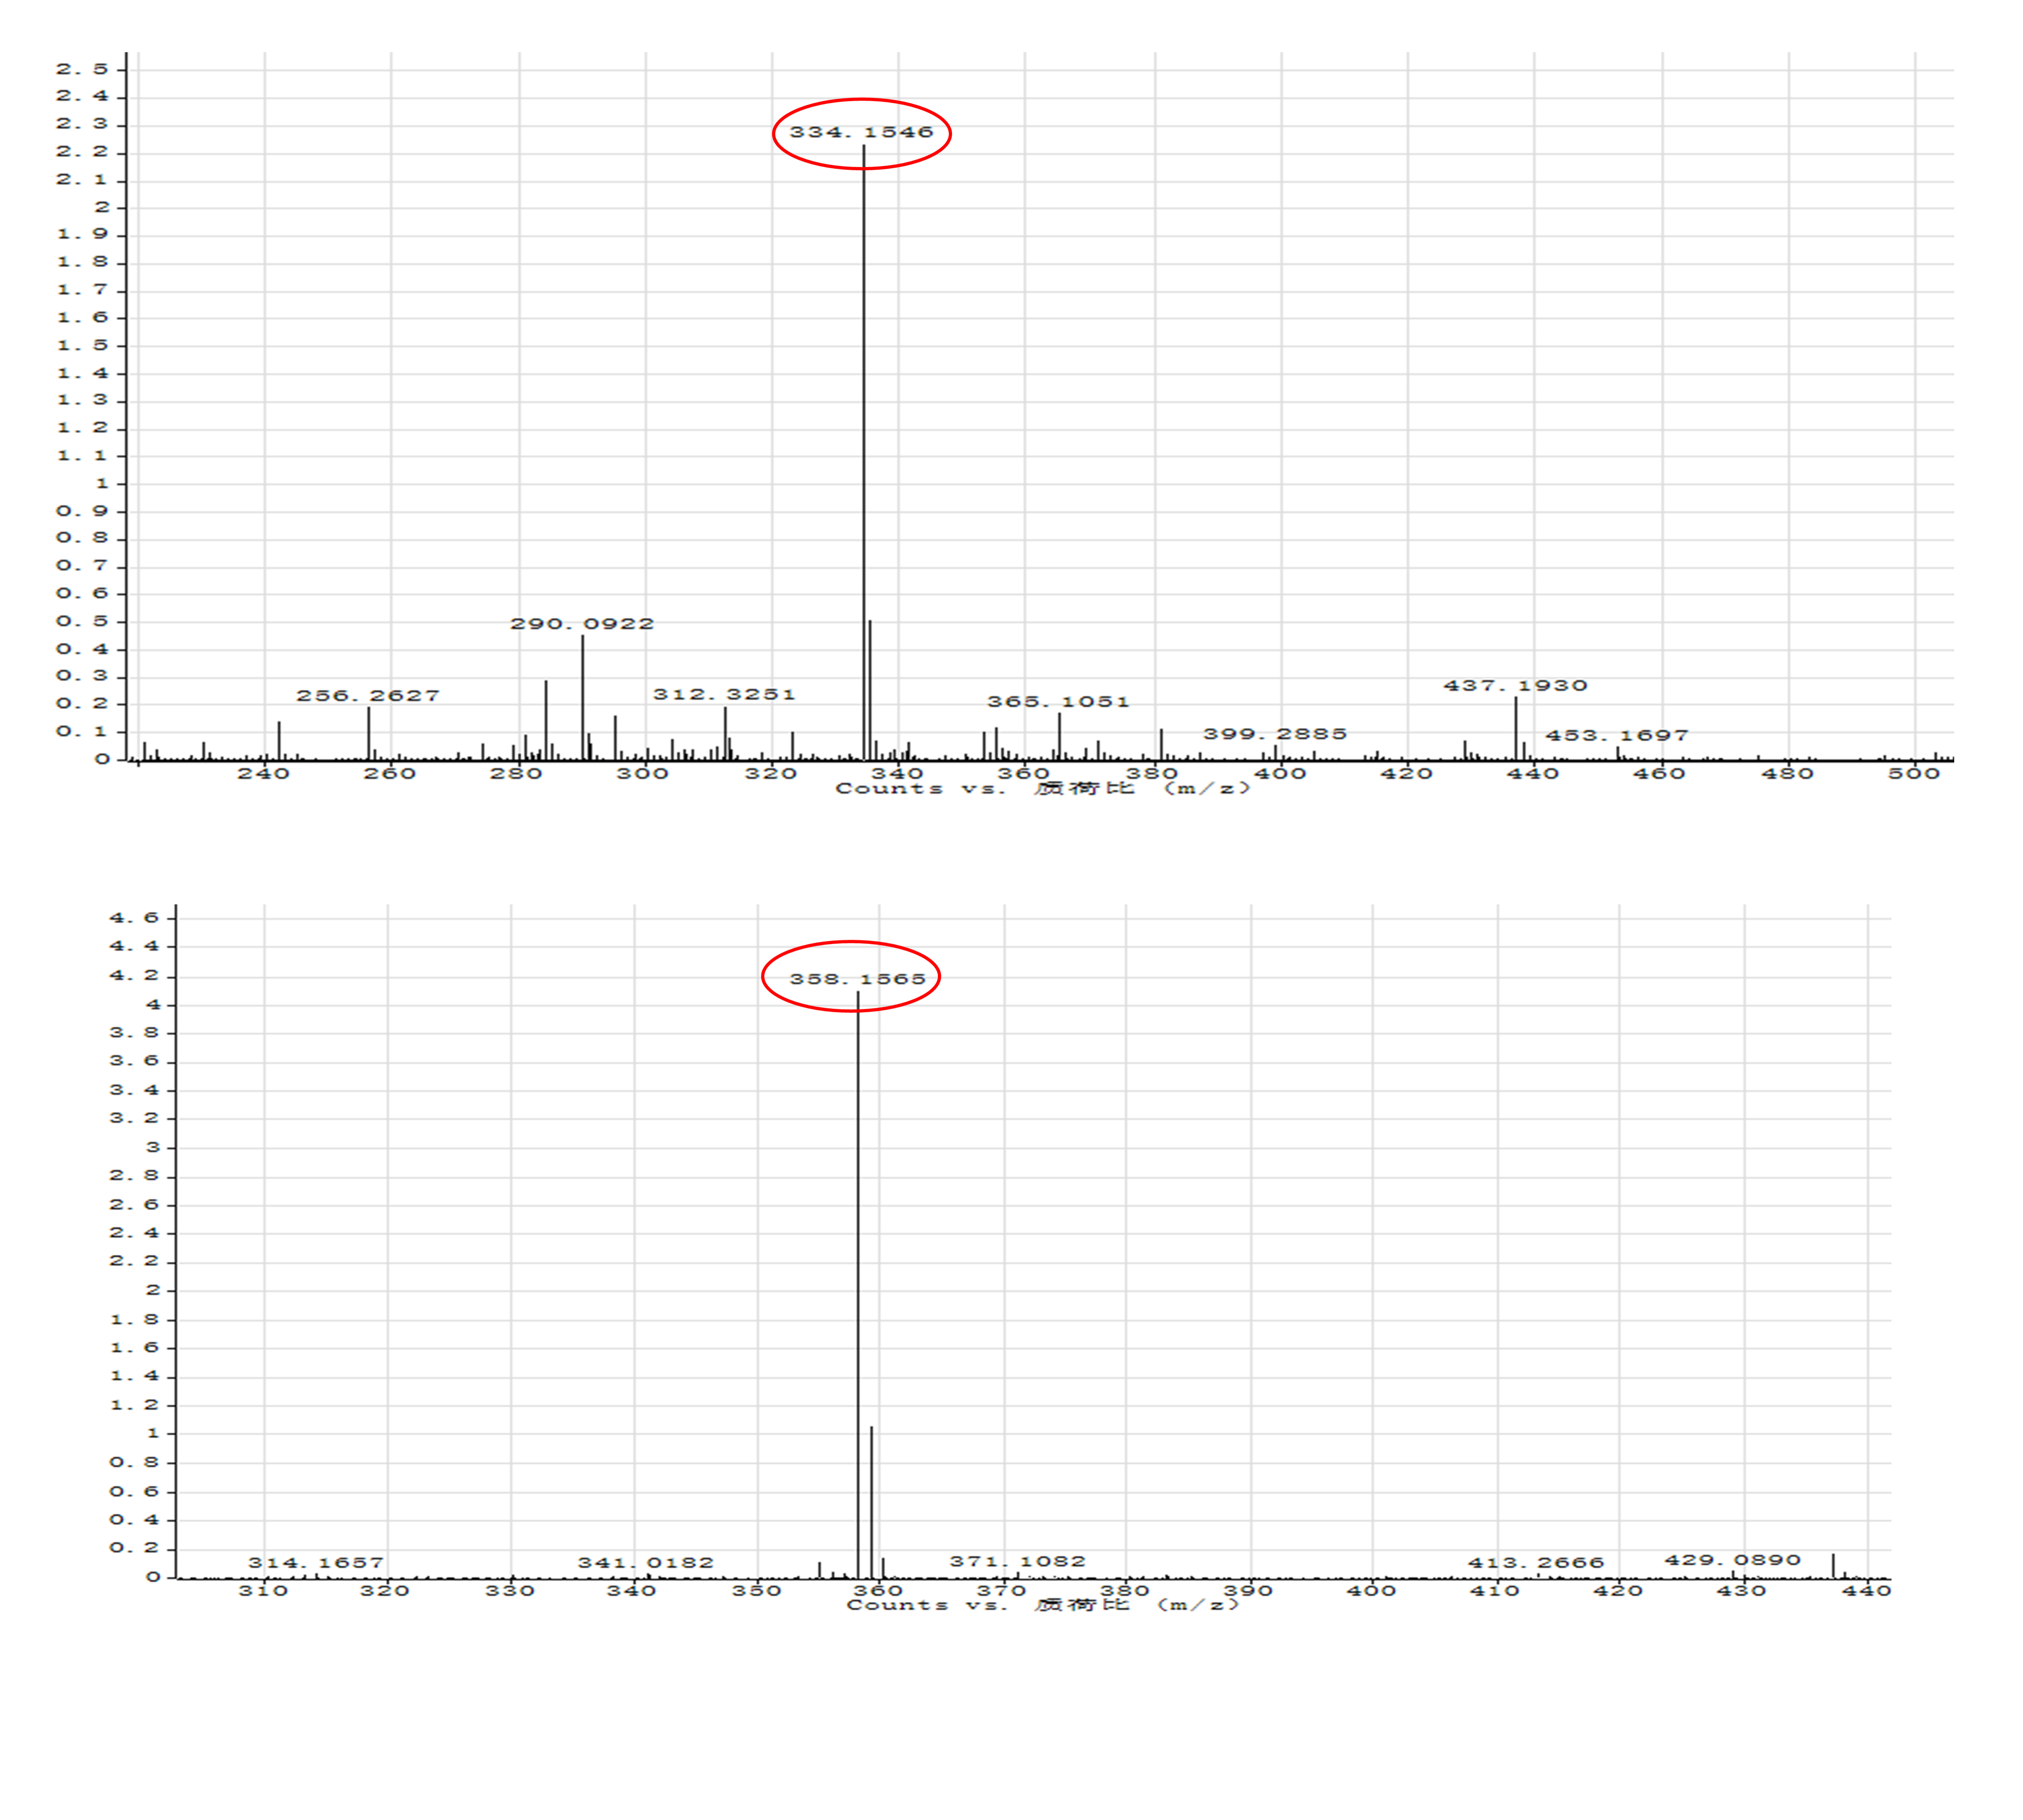


**Figure S9.** HRMS spectrum of compound **NNP-2**.


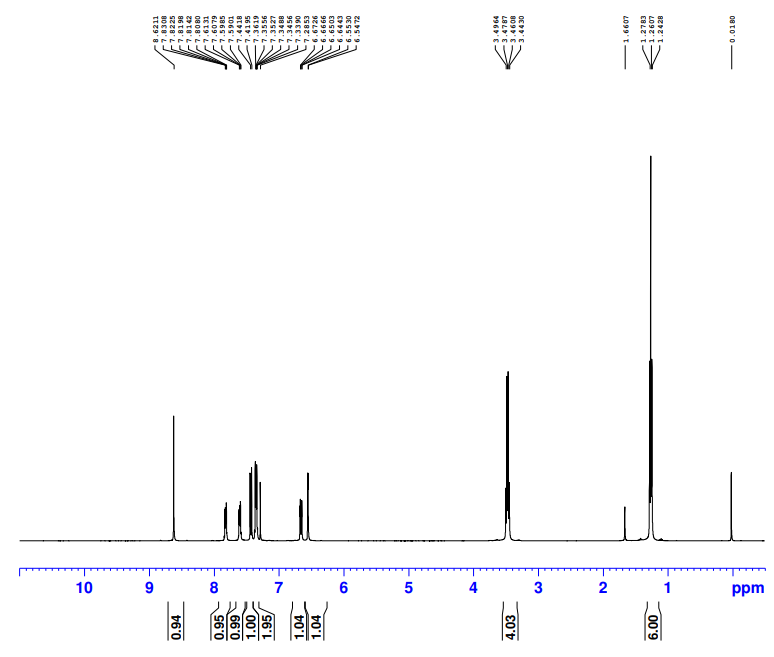


**Figure S10.** 1H NMR for **ONP-1** in Chloroform-*d*.


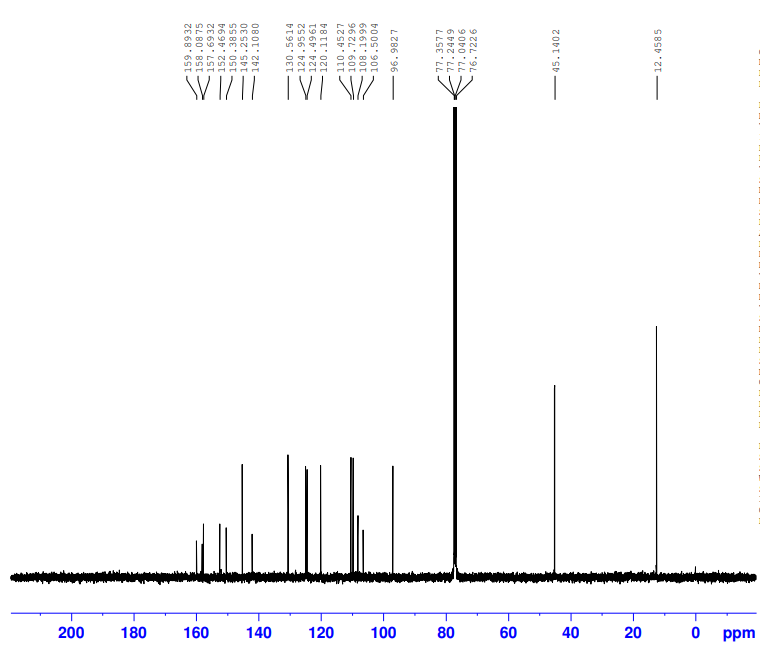


**Figure S11.** 13C NMR for **ONP-1** in Chloroform-*d*.


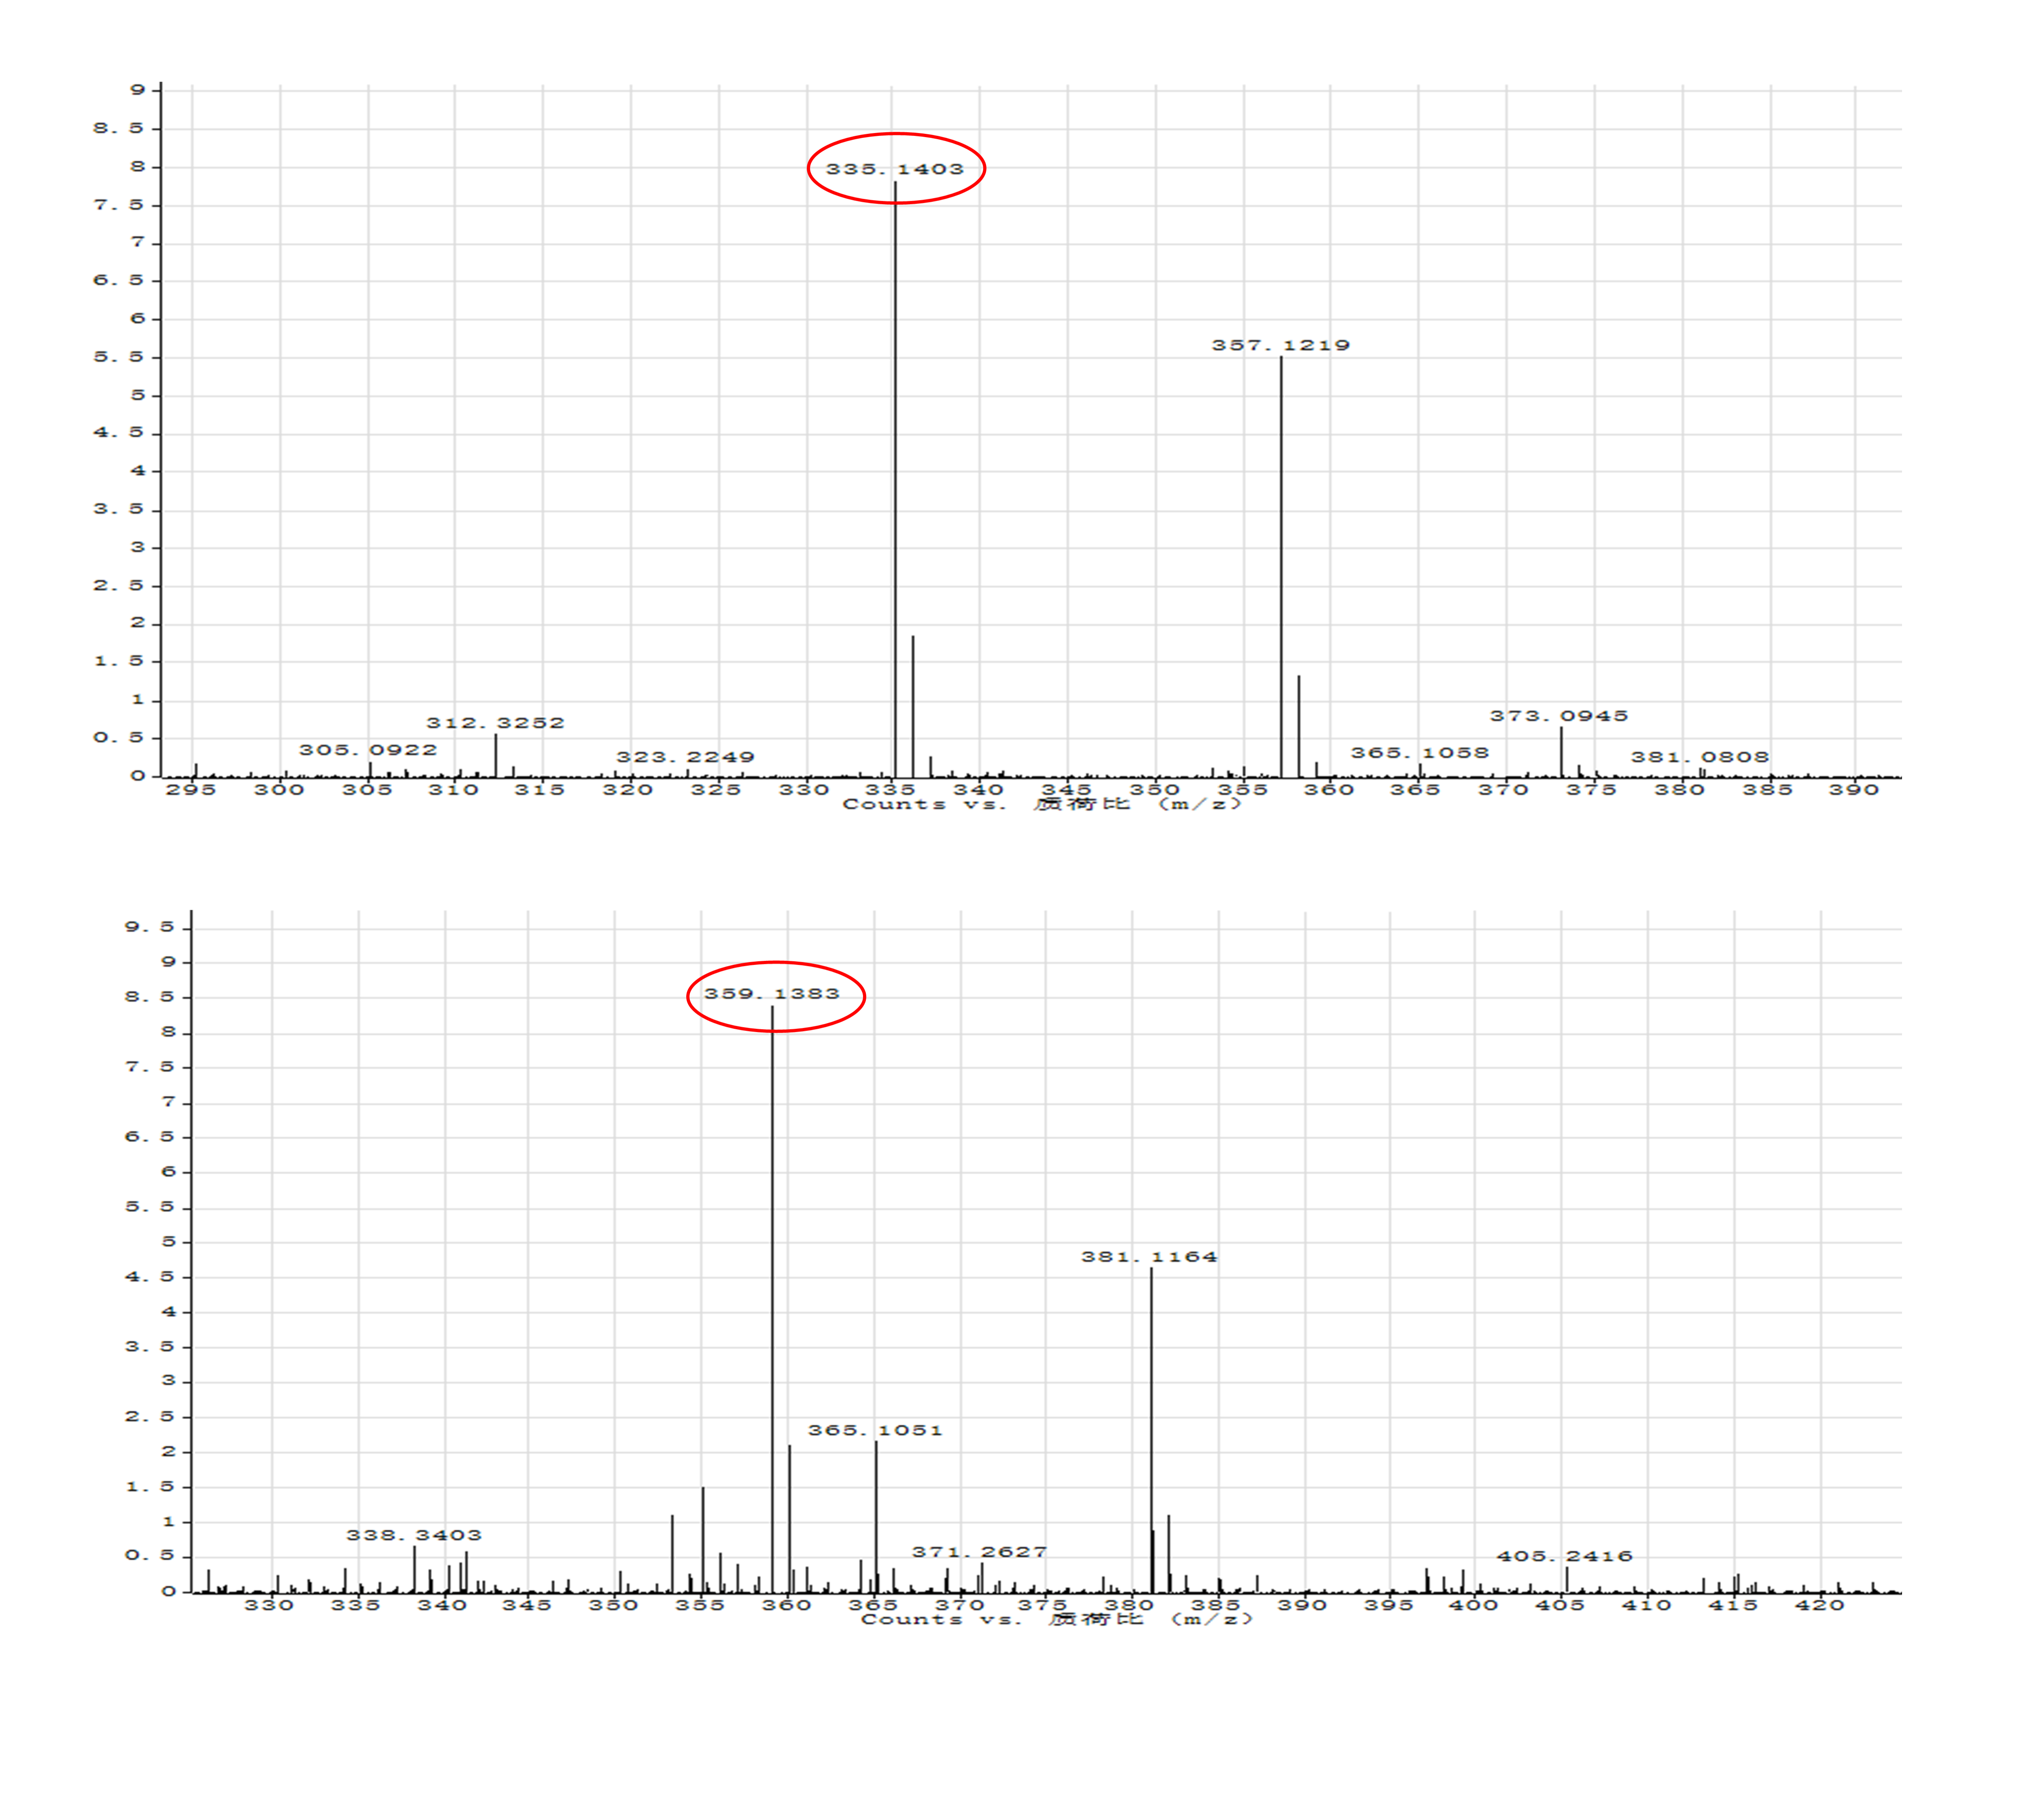


**Figure S12.** HRMS spectrum of compound **ONP-1**.


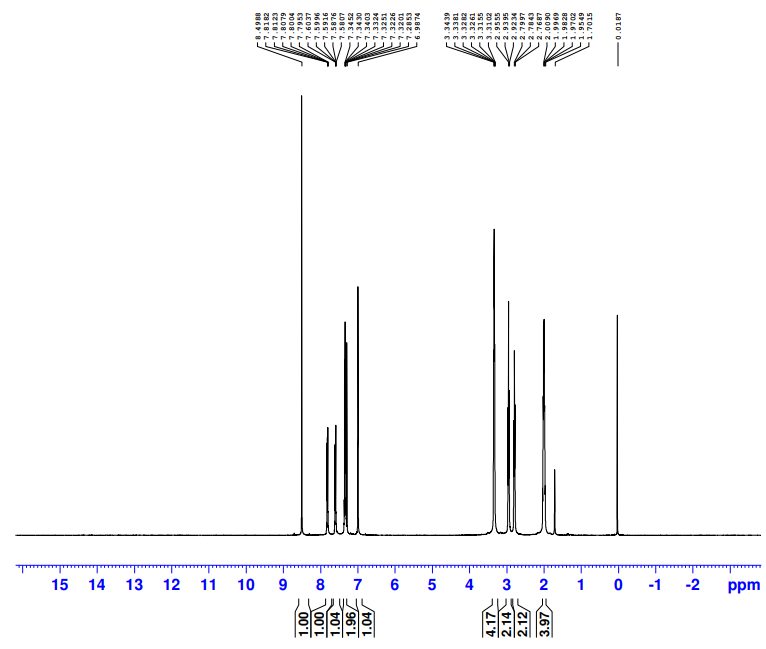


**Figure S13.** 1H NMR for **ONP-2** in Chloroform-*d*.


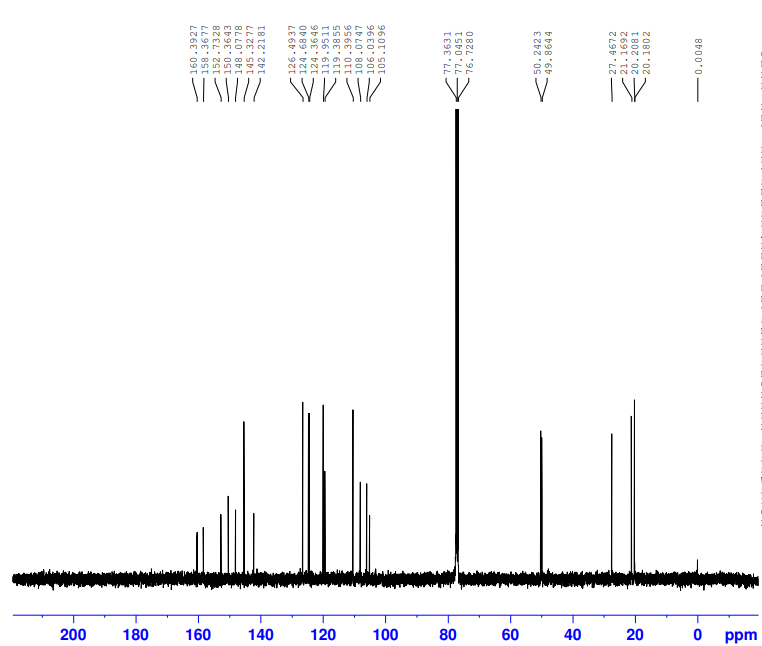


**Figure S14.** 13C NMR for **ONP-2** in Chloroform-*d*.


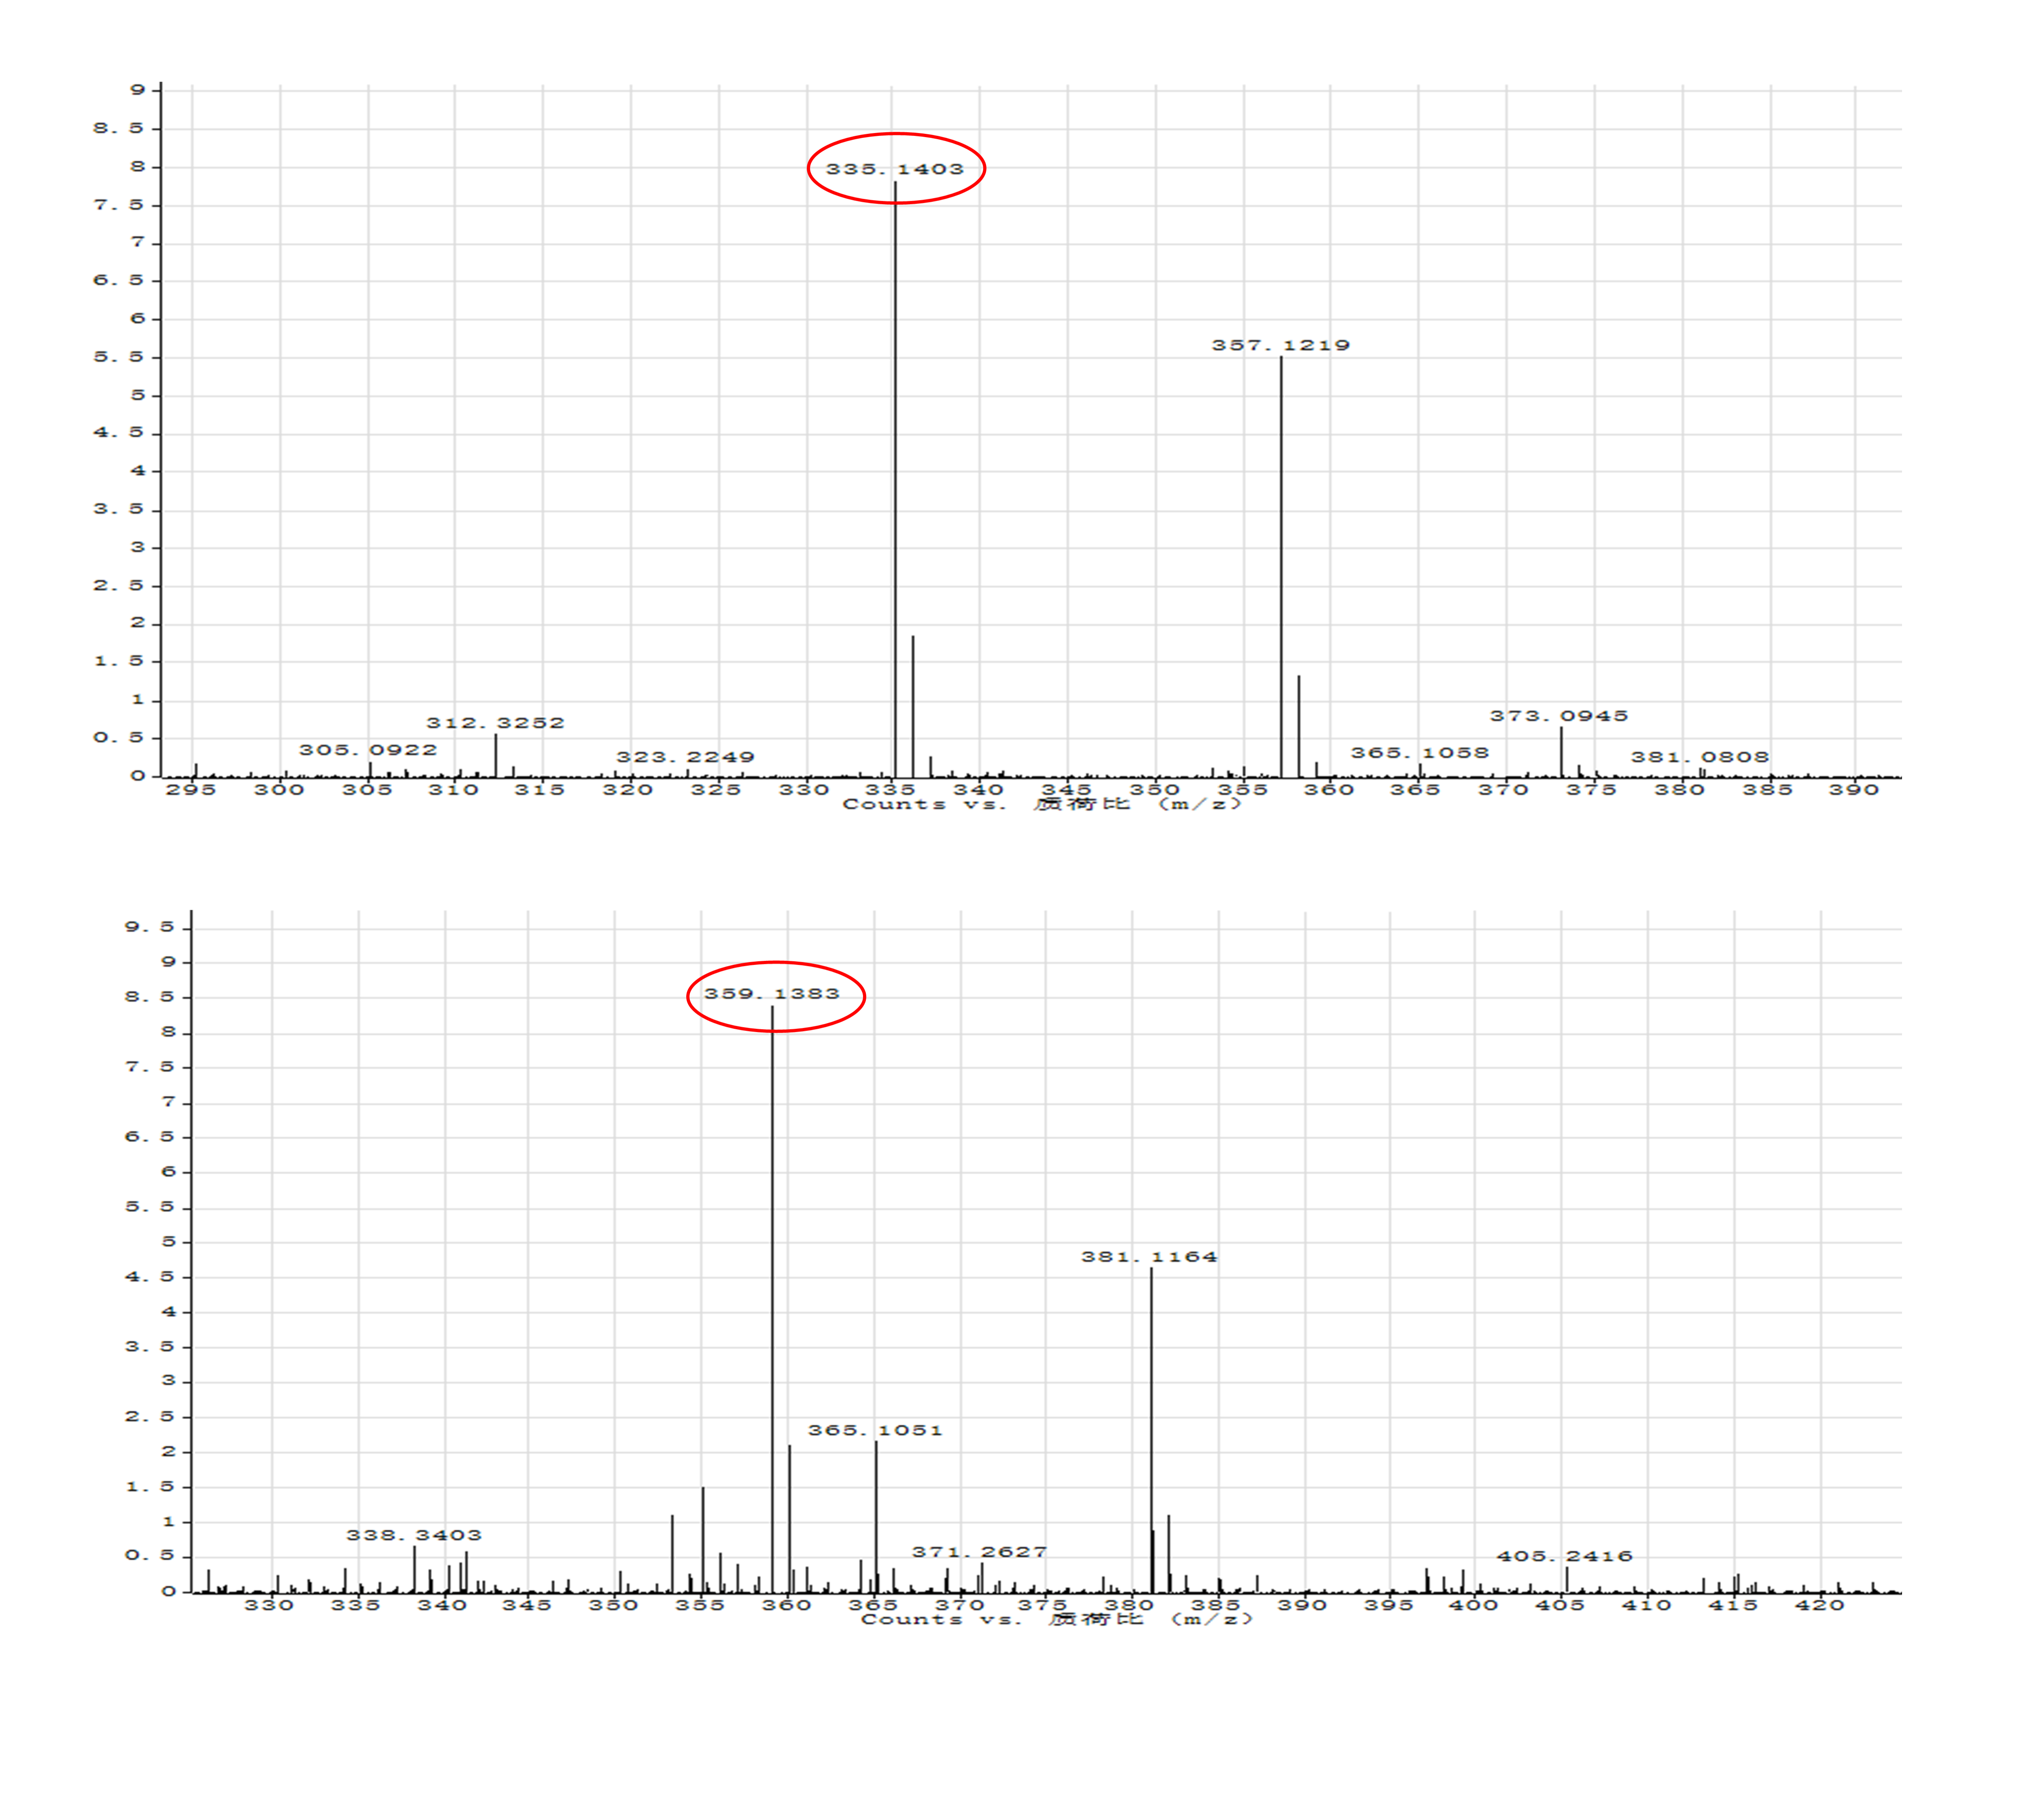


**Figure S15.** HRMS spectrum of compound **ONP-2**.


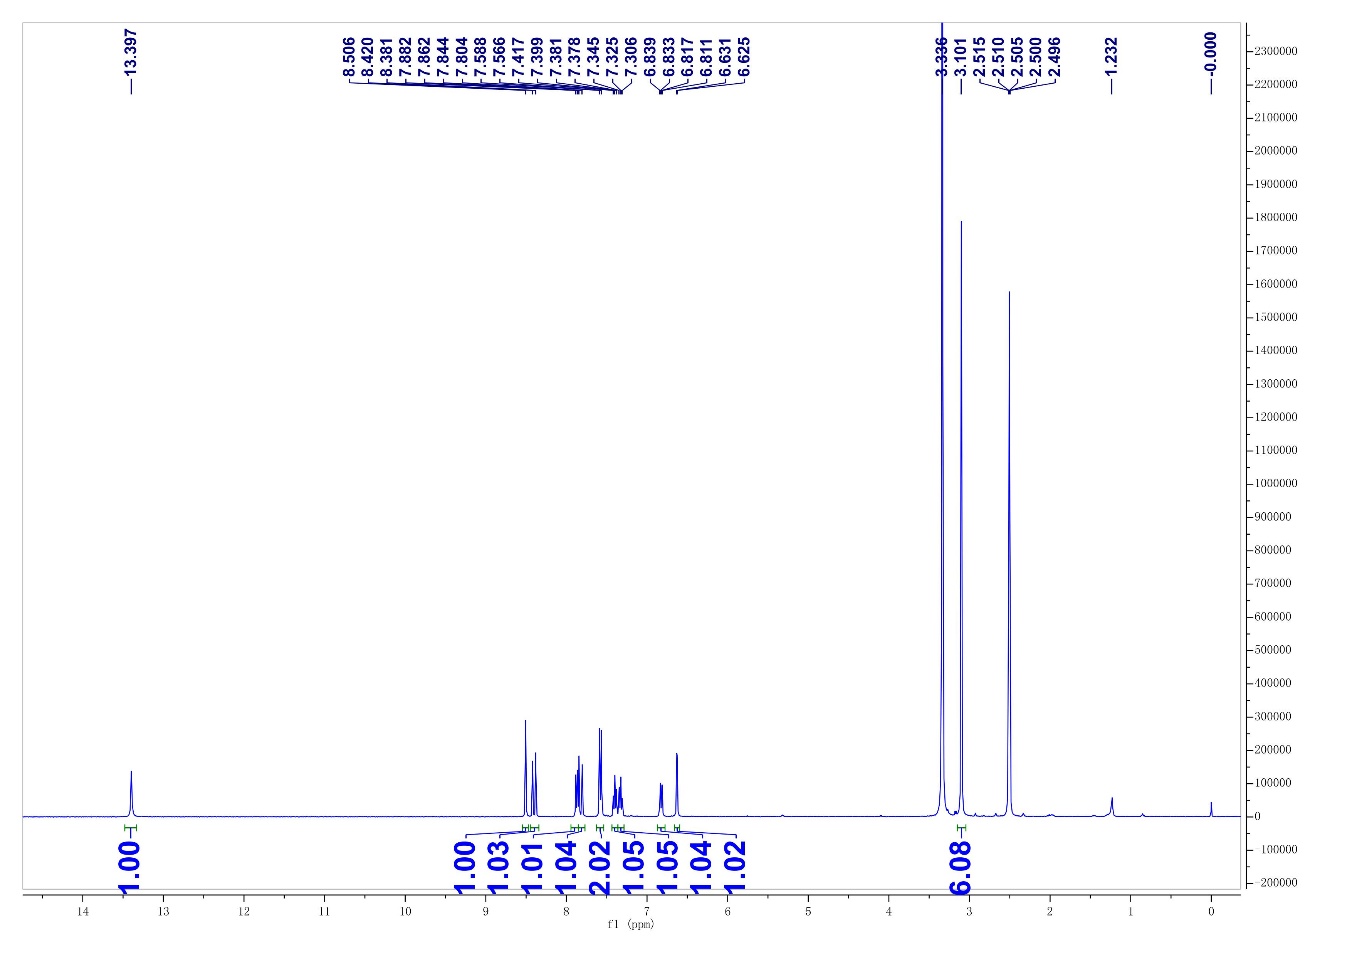


**Figure S16.** 1H NMR for **TrioAlert** in DMSO-*d*6.

**
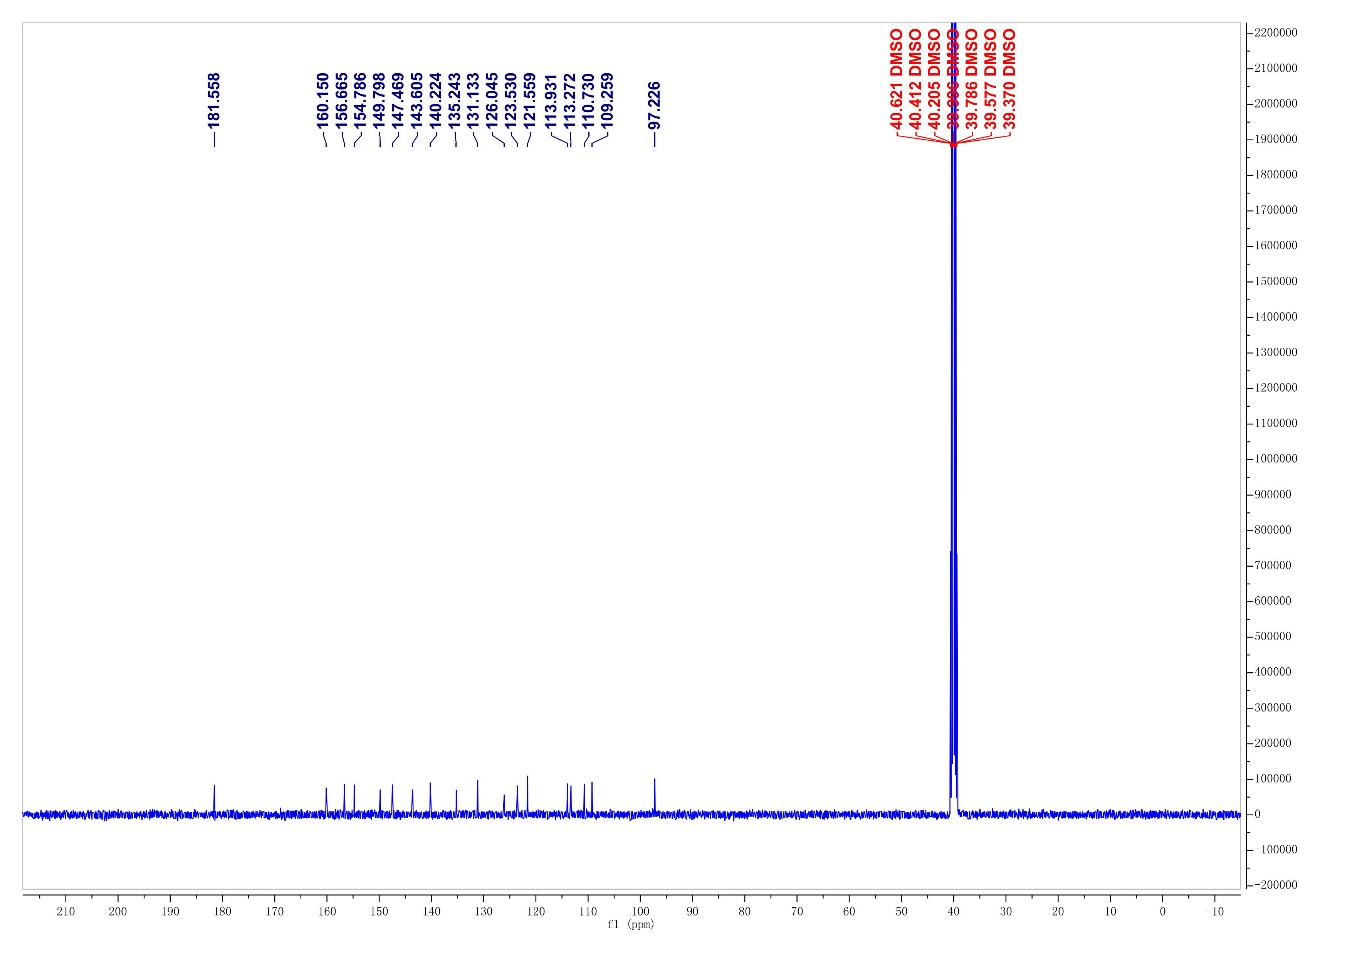
**

**Figure S17.** 13C NMR for **TrioAlert** in DMSO-*d*6.


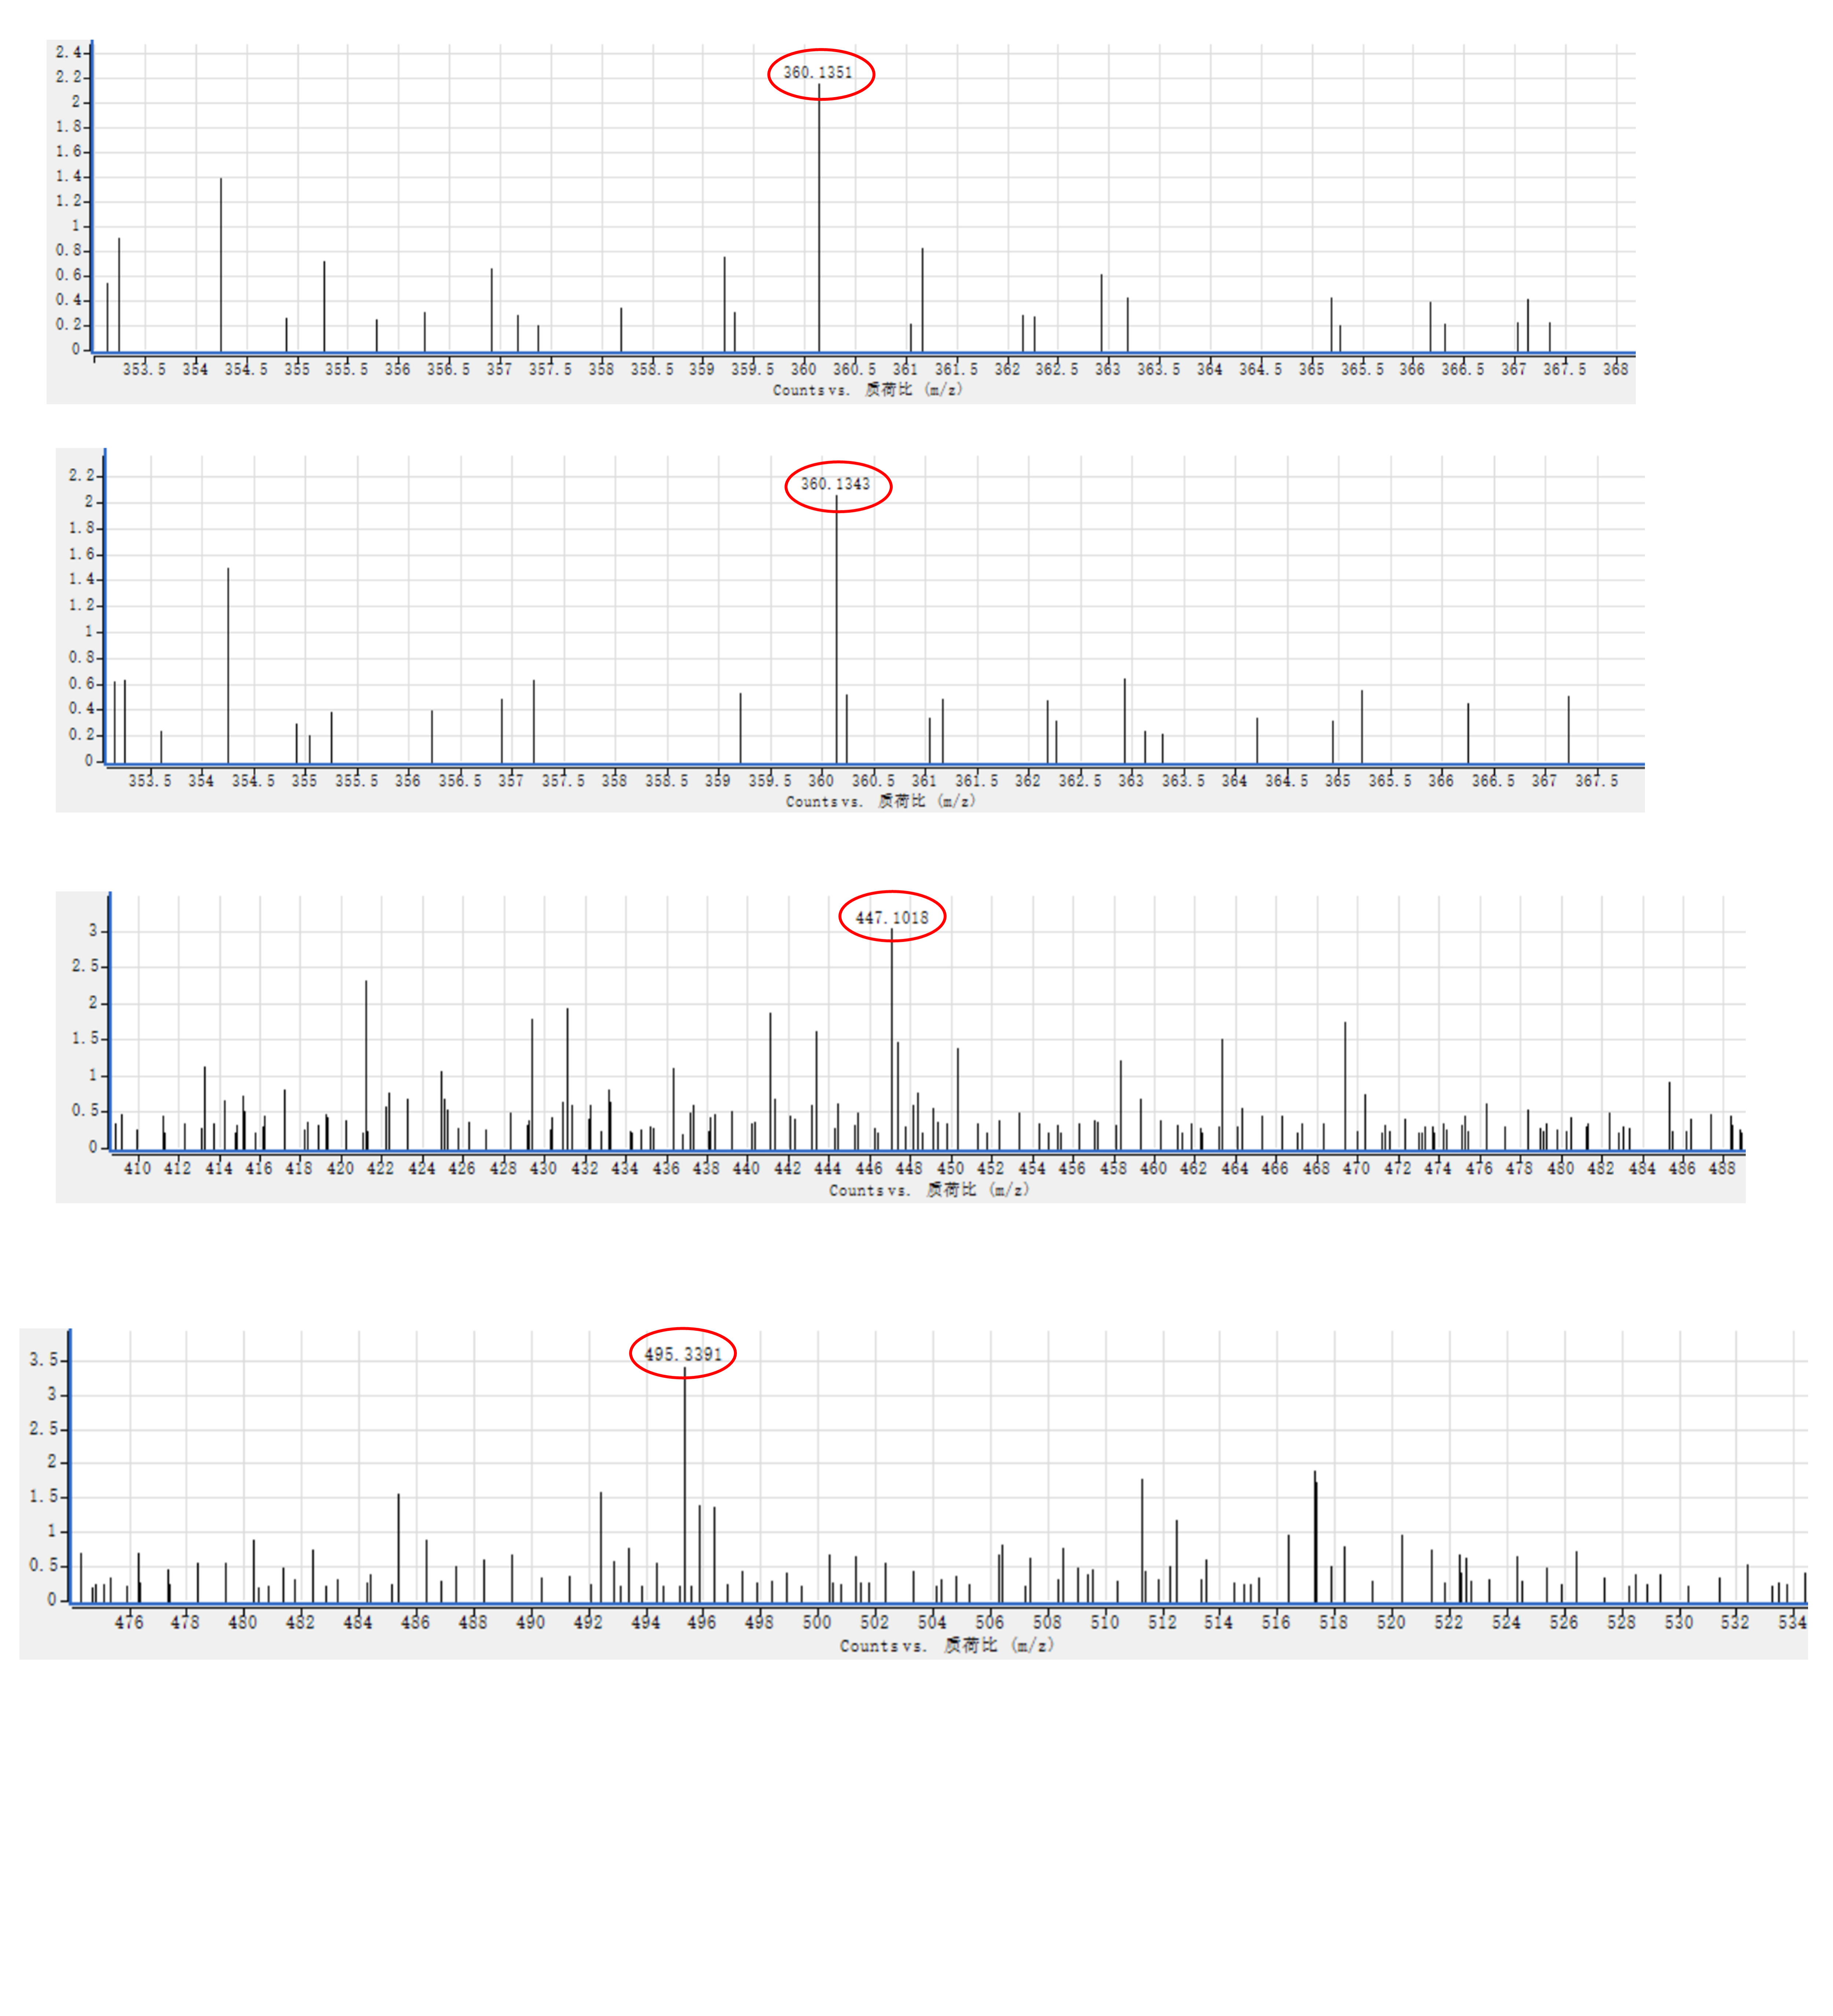


**Figure S18.** HRMS spectrum of compound **TrioAlert**.


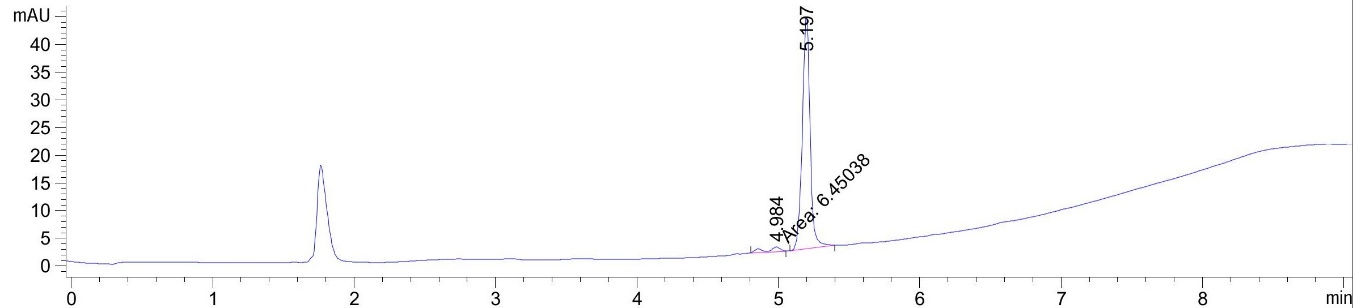


**Figure S19.** HPLC spectrum of compound **TrioAlert**.


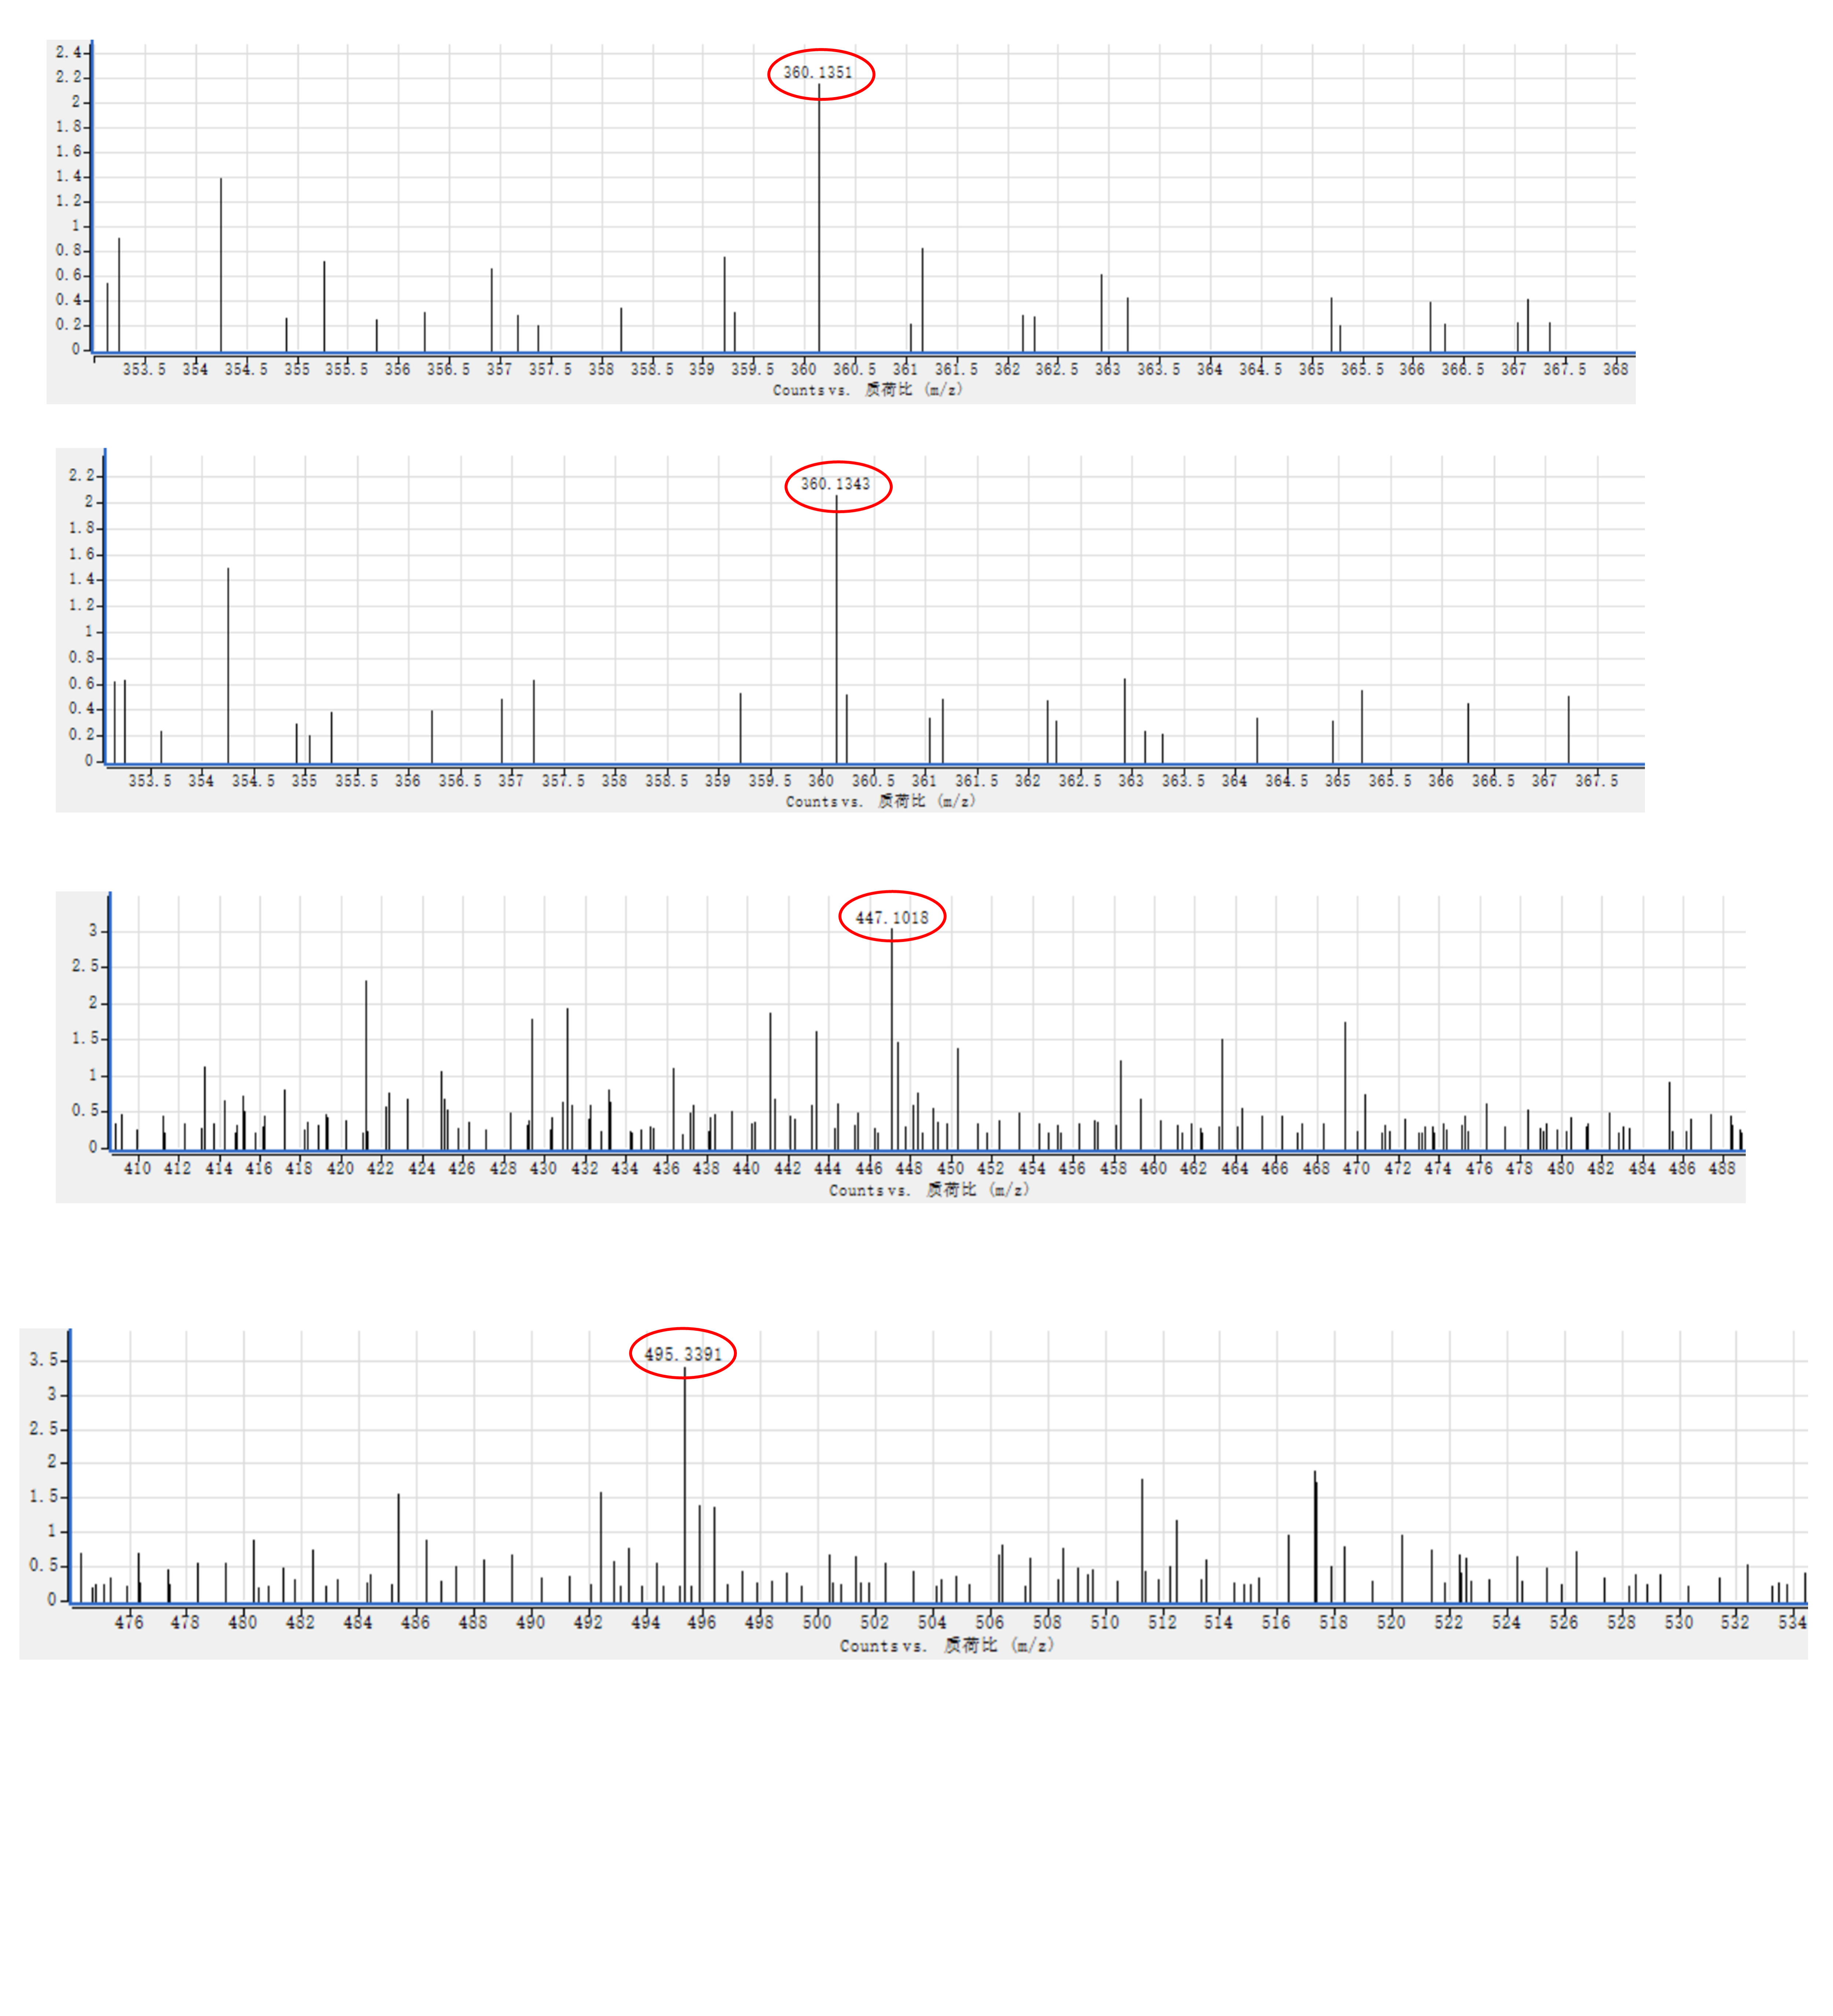


**Figure S20.** The HRMS of reaction product of **TrioAlert** with SM.


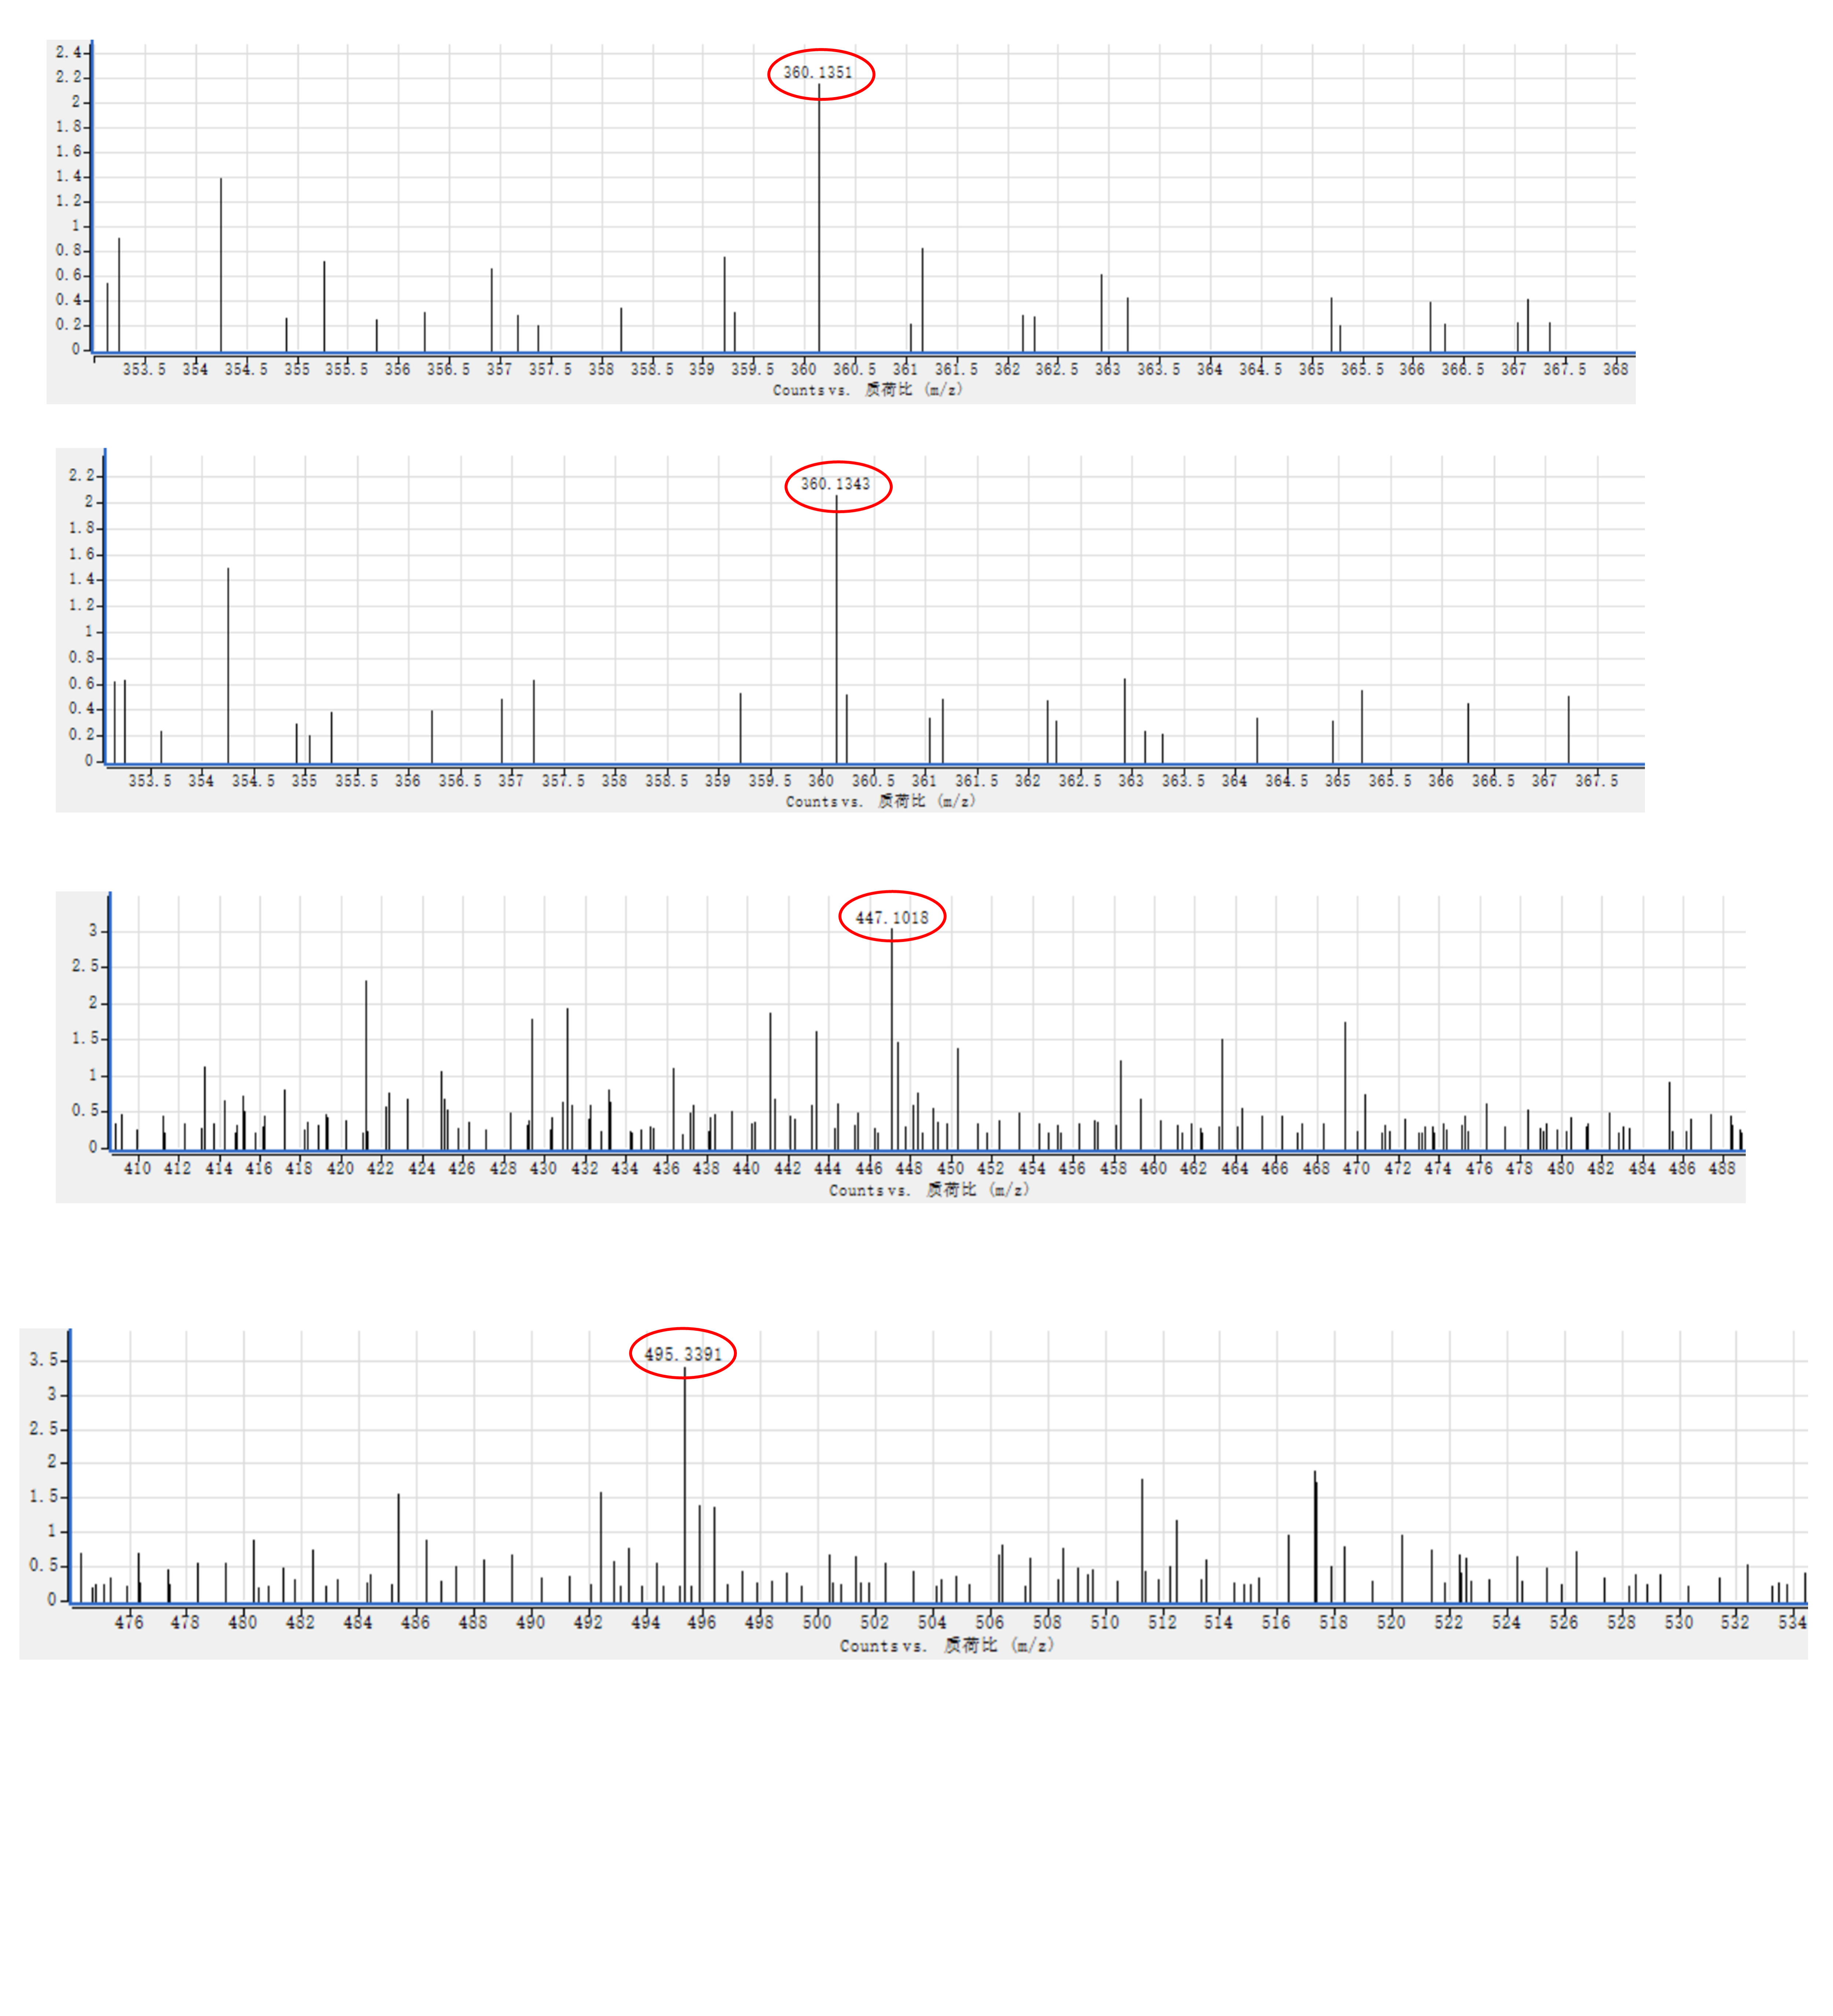


**Figure S21.** The HRMS of reaction product of **TrioAlert** with DCP.


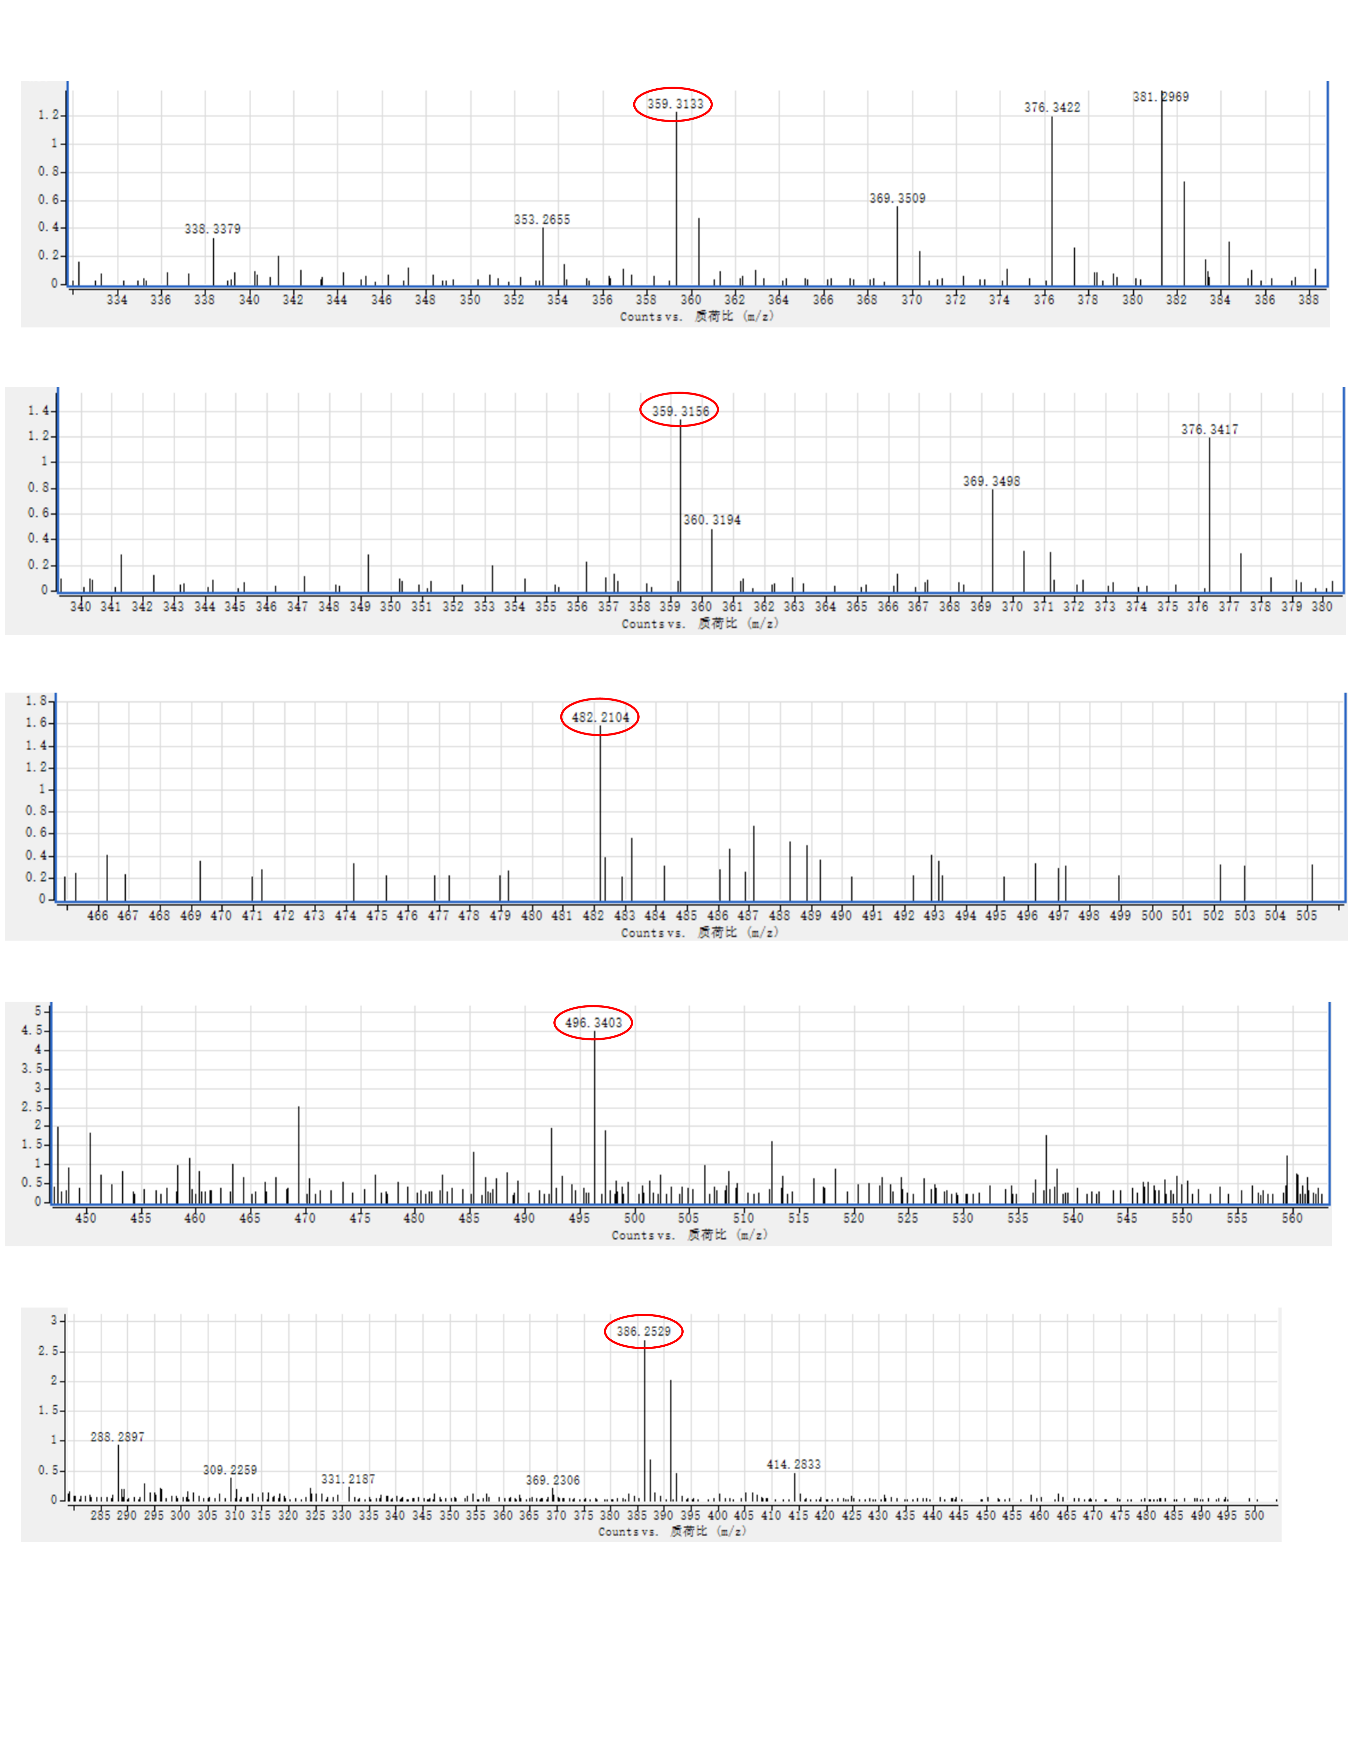


**Figure S22.** The HRMS of reaction product of **TrioAlert** with KCN.


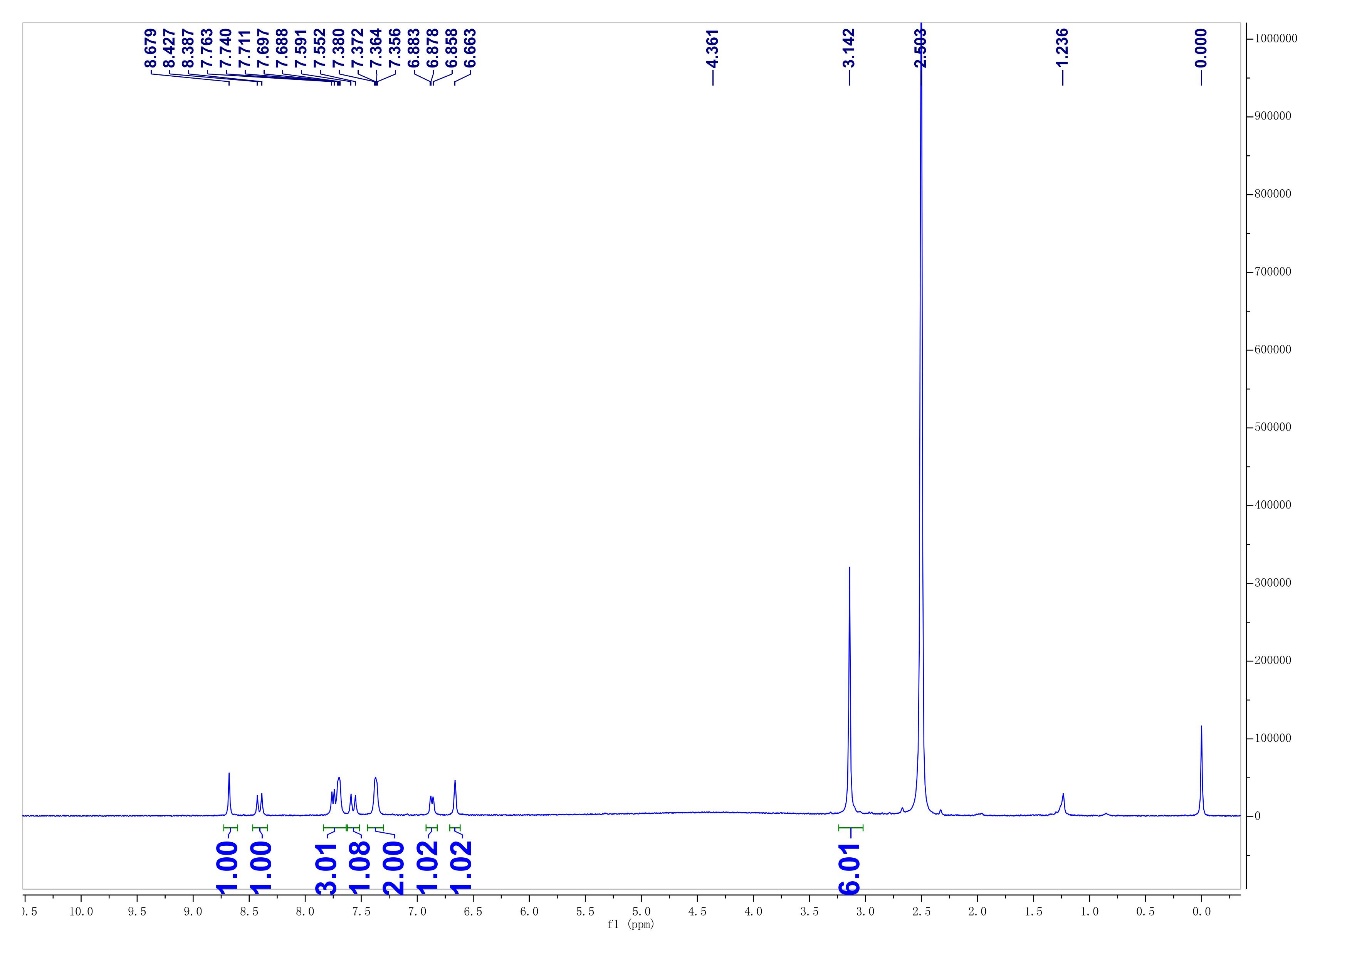


**Figure S23.** 1H NMR for **TrioAlert-B** in DMSO-*d*6.


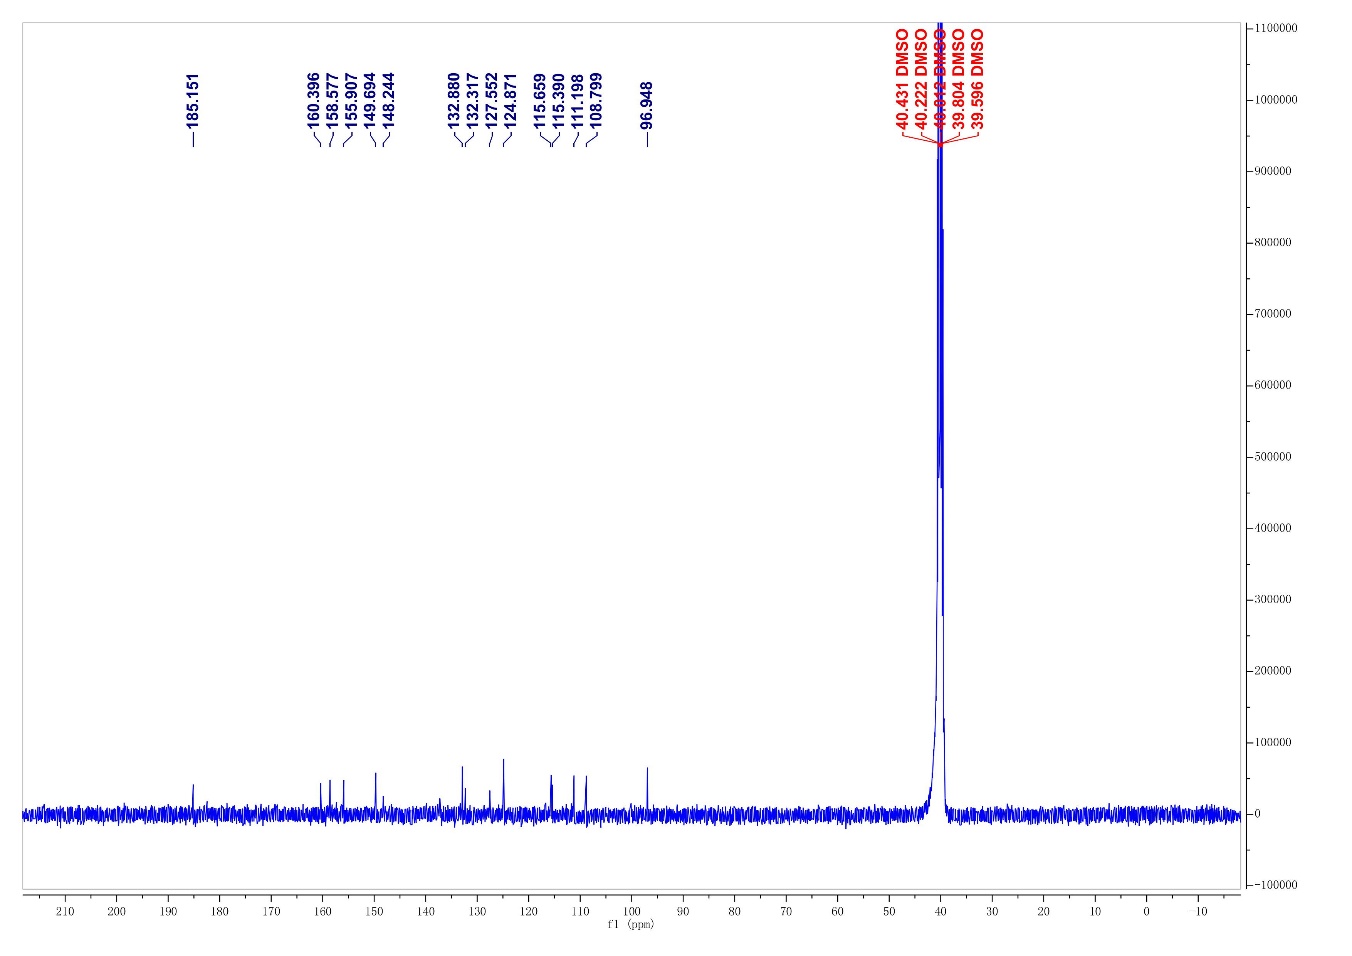


**Figure S24.** 13C NMR for **TrioAlert-B** in DMSO-*d*6.


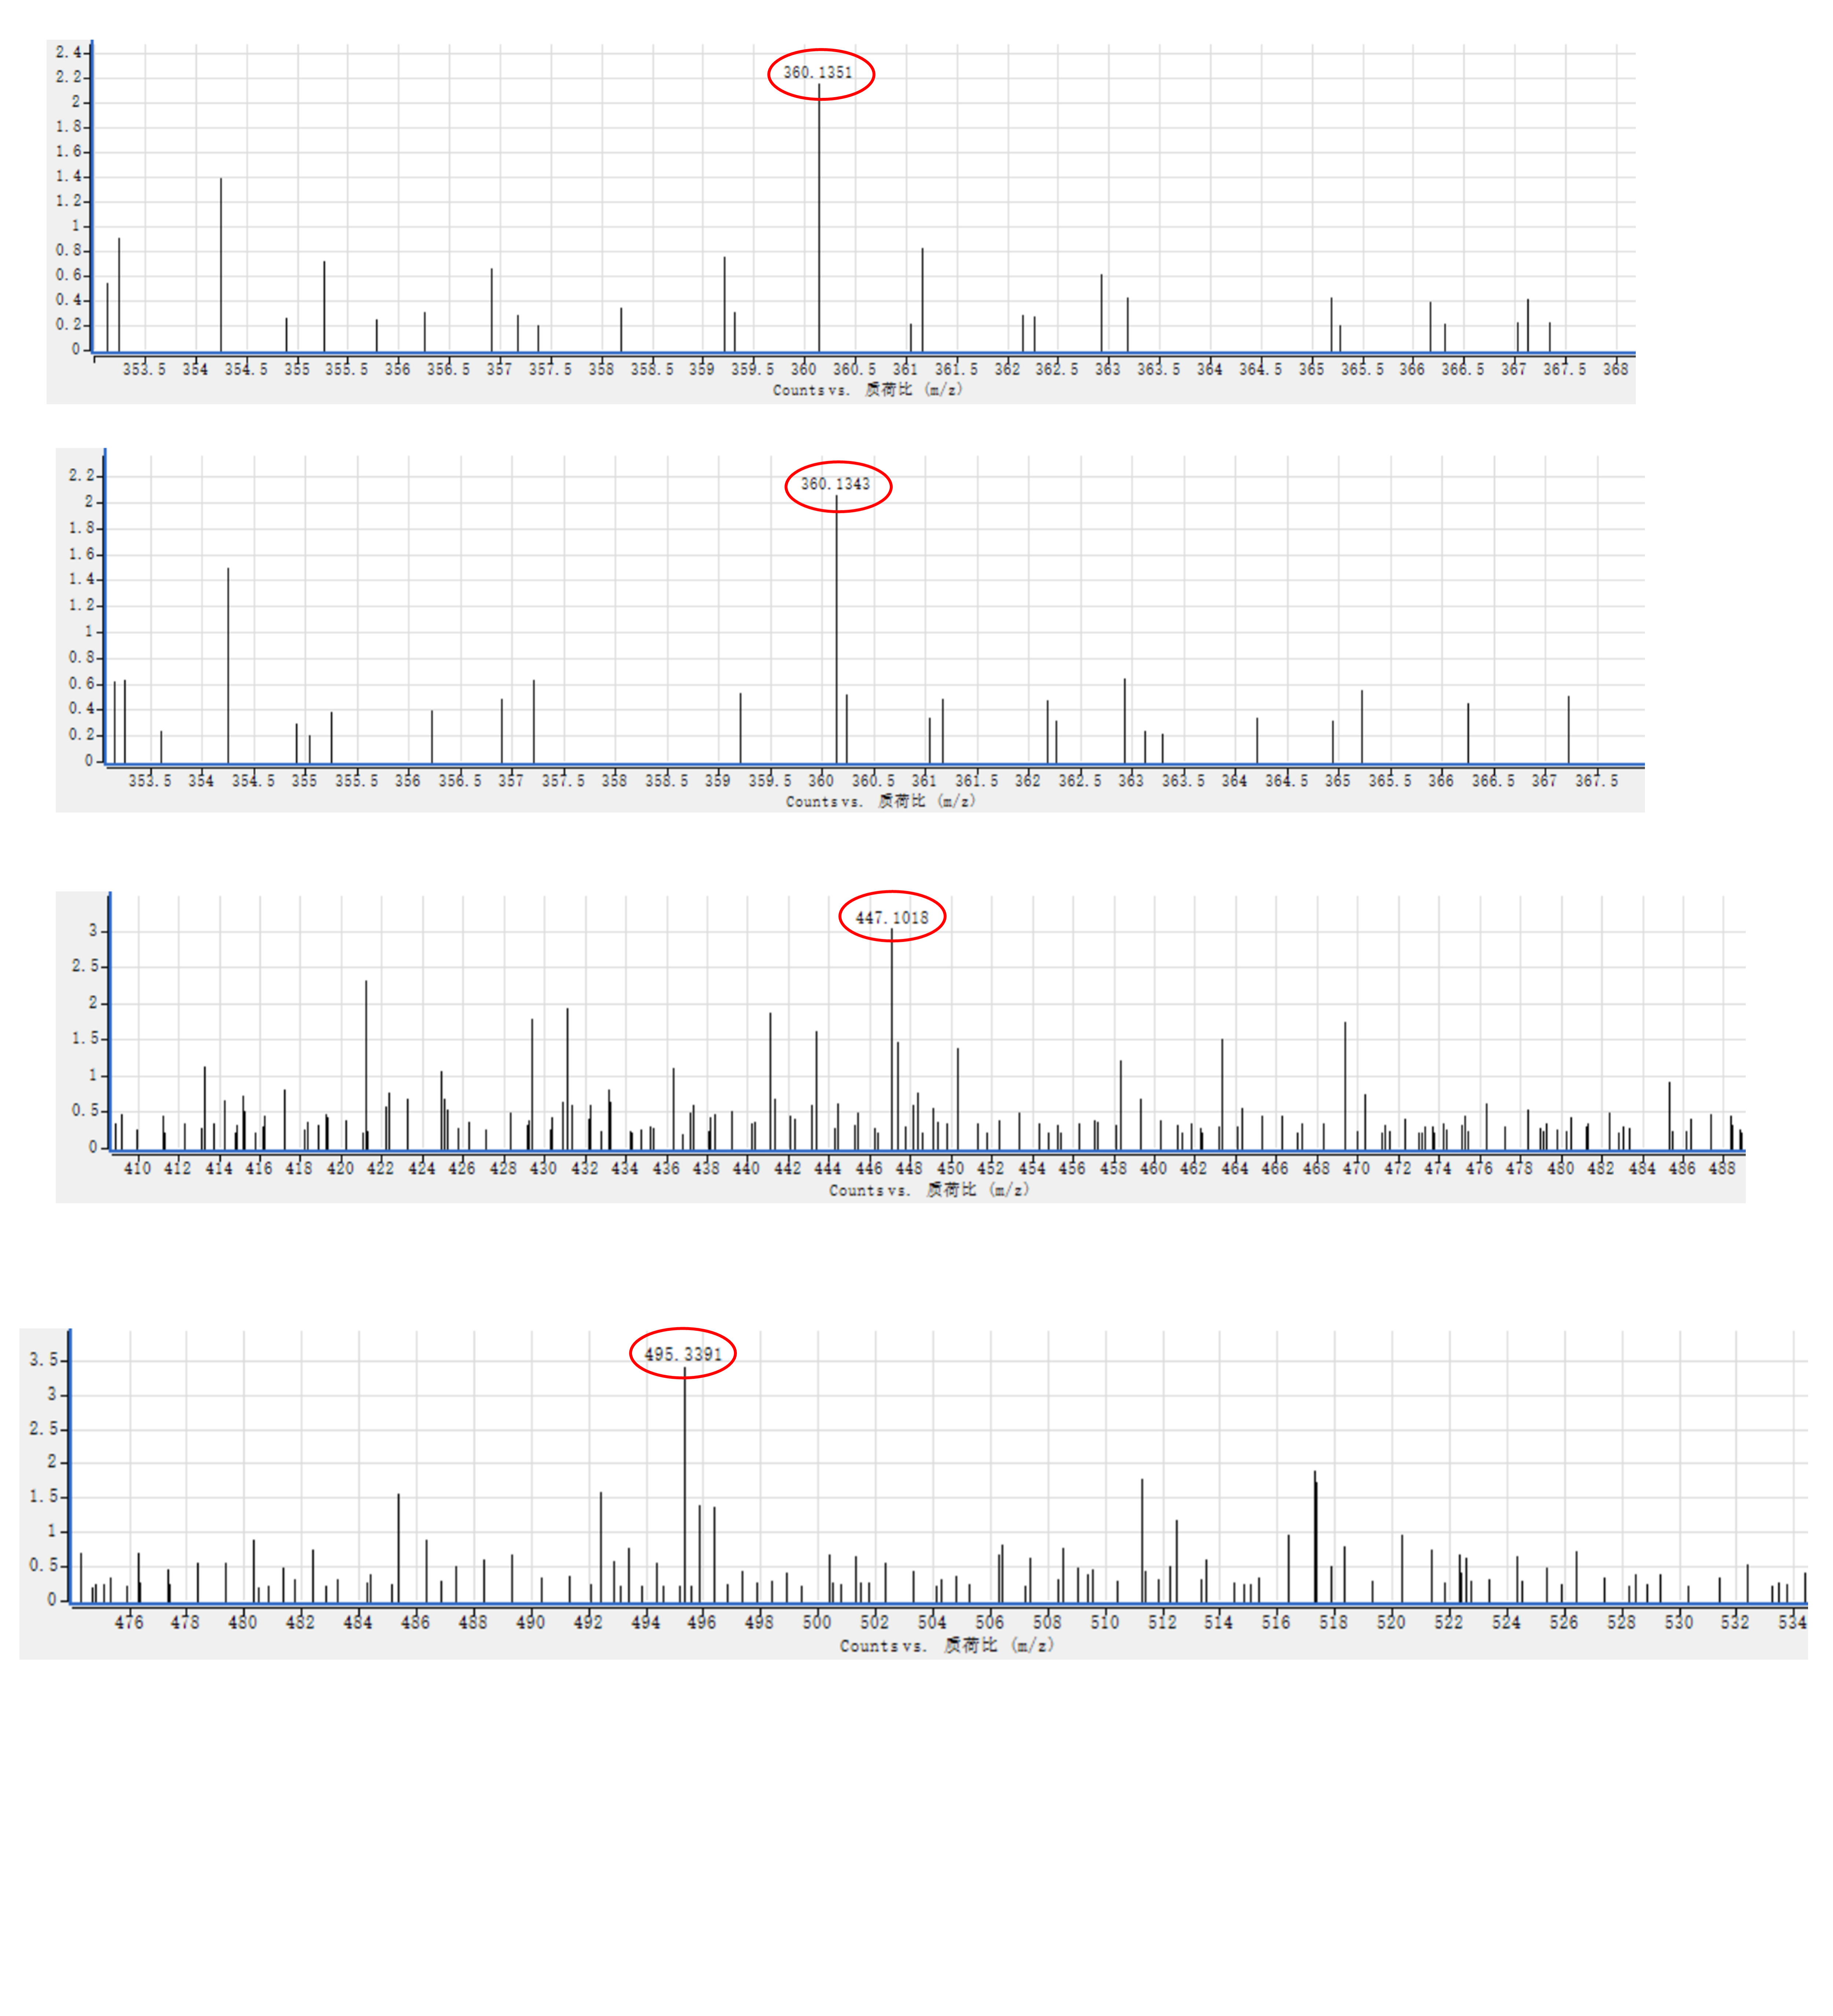


**Figure S25.** HRMS spectrum of compound **TrioAlert-B**.
